# Supplementary material
Source: MDPI journal article supplement (https://www.mdpi.com/2073-4441/9/6/442)
Supplement: s1 [file s1]

# Transparency, geomorphology, and mixing regime explain variability in trends in lake temperature and stratification across northeastern North America (1975 - 2012)

David C. Richardson<sup>1\*</sup>, Stephanie J. Melles<sup>2</sup>, Rachel M. Pilla<sup>3a</sup>, Amy L. Hetherington<sup>4</sup>, Lesley B. Knoll<sup>5</sup>, Craig E. Williamson<sup>3b</sup>, Benjamin M. Kraemer<sup>6,7</sup>, James R. Jackson<sup>8a</sup>, Elizabeth C. Long<sup>9</sup>, Karen Moore<sup>10</sup>, Lars G. Rudstam<sup>8b</sup>, James A. Rusak<sup>11</sup>, Jasmine E. Saros<sup>12</sup>, Sapna Sharma<sup>13</sup>, Kristin E. Strock<sup>14</sup>, Kathleen C. Weathers<sup>15</sup>, Courtney R. Wigdahl-Perry<sup>16</sup>

<sup>1</sup> SUNY New Paltz; 1 Hawk Drive; New Paltz, New York 12561, US; richardsond@newpaltz.edu

<sup>2</sup> Ryerson University; 350 Victoria Street; Toronto, Ontario M5B 2K3, CA; stephanie.melles@ryerson.ca

<sup>3</sup> Miami University, Department of Biology; 700 E High Street; Oxford, Ohio 45056, US; <sup>a</sup>pillarm@miamioh.edu, <sup>b</sup>willia85@miamioh.edu

<sup>4</sup> Virginia Polytechnic Institute and State University; 2011 Derring Hall; 926 West Campus Drive; Blacksburg, Virginia 24061, US; amyheth@vt.edu

<sup>5</sup> University of Minnesota Twin Cities; Itasca Biological Station and Laboratories; 28131 University Circle; Lake Itasca, Minnesota 56470, US; lbknoll@umn.edu

<sup>6</sup> University of Wisconsin-Madison, 680 North Park Street, Madison, Wisconsin 53706, US

<sup>7</sup> Leibniz Institute of Freshwater Ecology and Inland Fisheries, Müggelseedamm 310, Berlin, Germany 12587, DE; ben.m.kraemer@gmail.com

<sup>8</sup> Cornell University Biological Field Station, Department of Natural Resources, 900 Shackelton Point Road, Bridgeport, New York 13030, US; <sup>a</sup>jrj26@cornell.edu, <sup>b</sup>lgr1@cornell.edu

<sup>9</sup> Mohonk Preserve, Daniel Smiley Research Center, P.O. Box 715, New Paltz, New York 12561, US; elong@mohonkpreserve.org

<sup>10</sup> New York City Department of Environmental Protection, 71 Smith Avenue Kingston, New York 12401, US; karenmoore@dep.nyc.gov

<sup>11</sup> Dorset Environmental Science Centre, Ontario Ministry of the Environment and Climate Change, P.O. Box 39, Dorset, Ontario, P0A1E0, CA; Jim.Rusak@ontario.ca

<sup>12</sup> University of Maine, 137 Sawyer Research Center, Orono, ME 04401, US; jasmine.saros@maine.edu

<sup>13</sup> Department of Biology, York University, Toronto, Ontario M3P1J3, CA; sharma11@yorku.ca

<sup>14</sup> Dickinson College, 28 North College Street, Carlisle, Pennsylvania 17013, US; strockk@dickinson.edu

<sup>15</sup> Cary Institute of Ecosystem Studies, Box AB, Millbrook, NY 12545, US; weathersk@caryinstitute.org

<sup>16</sup> State University of New York at Fredonia, 280 Central Avenue, Fredonia, NY 14063, US; courtney.wigdahl@fredonia.edu

\* Correspondence: richardsond@newpaltz.edu; Tel.: +01-845-257-3805

## Supporting Information

Table S1: Metadata information for all 231 lakes

**Table S1.** Metadata for all 231 lakes included in the 1975, 1985, or both cohort(s). Metadata variables include location, latitude (°), longitude (°), elevation (m above sea level), distance to Atlantic coast (m), surface area (ha), fetch (m), mean depth (m), maximum depth (m), Secchi depth (m), chlorophyll-*a* (µg/L), and total phosphorus (µg/L). Lakes are sorted alphabetically first by state/province and then alphabetically by lake name.

| Lake Name (ID)                      | Cohort<br>(1975 cohort,<br>1985 cohort,<br>Both cohorts) | Location<br>(State/Province,<br>Country) | Lat.   | Long.   | Elevation<br>(m asl) | Distance to<br>Atlantic<br>Coast (m) | Surface<br>Area<br>(ha) | Fetch<br>(m) | Mean<br>Depth<br>(m) | Maximum<br>Depth<br>(m) | Secchi<br>Depth<br>(m) | Chl-a<br>(ug/L) | TP<br>(ug/L) |
|-------------------------------------|----------------------------------------------------------|------------------------------------------|--------|---------|----------------------|--------------------------------------|-------------------------|--------------|----------------------|-------------------------|------------------------|-----------------|--------------|
| MA.Quabbin                          | 1985 cohort                                              | Massachusetts, USA                       | 42.359 | -72.300 | 159.0                | 97326.8                              | 10200.0                 | 27196.1      | 16.0                 | 46.0                    | 10.8                   | NA              | NA           |
| ME.AdamsPond.3396                   | 1985 cohort                                              | Maine, USA                               | 43.995 | -70.712 | 190.5                | 49731.8                              | 17.4                    | 583.4        | 6.1                  | 15.5                    | 7.2                    | 2.5             | 17.6         |
| ME.AdamsPond.5366                   | 1985 cohort                                              | Maine, USA                               | 43.892 | -69.632 | 11.3                 | 0.0                                  | 31.6                    | 1044.5       | 3.7                  | 6.7                     | 4.2                    | 7.2             | 16.7         |
| ME.AndroscogginLake.3836            | 1985 cohort                                              | Maine, USA                               | 44.324 | -70.085 | 82.0                 | 37858.3                              | 1626.8                  | 6815.1       | 4.6                  | 11.6                    | 4.2                    | 6.9             | 16.8         |
| ME.AnnabessacookLake.9961           | Both cohorts                                             | Maine, USA                               | 44.270 | -69.980 | 52.1                 | 27721.8                              | 572.6                   | 6245.7       | 6.4                  | 14.9                    | 3.6                    | 11.6            | 44.1         |
| ME.AuburnLake.3748                  | Both cohorts                                             | Maine, USA                               | 44.145 | -70.253 | 79.2                 | 34817.4                              | 921.5                   | 5565.5       | 11.0                 | 36.0                    | 7.3                    | 3.4             | 11.5         |
| ME.Bear&LittleBearPds.3624          | Both cohorts                                             | Maine, USA                               | 44.339 | -70.278 | 113.7                | 49641.2                              | 176.8                   | 2903.2       | 3.7                  | 8.5                     | 5.4                    | 3.7             | 9.7          |
| ME.BearPond.3420                    | Both cohorts                                             | Maine, USA                               | 44.153 | -70.718 | 114.6                | 60154.0                              | 101.2                   | 1689.6       | 9.4                  | 21.9                    | 5.4                    | 3.7             | 10.3         |
| ME.BeaverPond.5582                  | 1985 cohort                                              | Maine, USA                               | 44.066 | -70.772 | 145.7                | 57567.4                              | 27.9                    | 819.6        | 3.4                  | 10.7                    | 5.1                    | 4.7             | 14.3         |
| ME.BeechHillPond.4352               | 1985 cohort                                              | Maine, USA                               | 44.690 | -68.460 | 60.7                 | 26706.7                              | 575.5                   | 6059.8       | 13.4                 | 31.7                    | 8.9                    | 1.5             | 5.2          |
| ME.BerryPond.3828                   | Both cohorts                                             | Maine, USA                               | 44.334 | -70.024 | 73.8                 | 35468.3                              | 70.8                    | 3166.9       | 4.3                  | 7.6                     | 4.5                    | 4.3             | 12.0         |
| ME.BiscayPond.5710                  | 1985 cohort                                              | Maine, USA                               | 44.003 | -69.479 | 23.5                 | 5220.2                               | 154.6                   | 5209.3       | 11.9                 | 18.6                    | 5.0                    | 4.4             | 9.1          |
| ME.BranchLake.4328                  | 1985 cohort                                              | Maine, USA                               | 44.595 | -68.559 | 72.5                 | 14705.4                              | 1190.6                  | 8675.8       | 11.9                 | 37.8                    | 8.4                    | 2.2             | 4.5          |
| ME.BryantPond(LakeChristopher).3464 | 1985 cohort                                              | Maine, USA                               | 44.376 | -70.650 | 211.8                | 75262.9                              | 111.7                   | 2026.1       | 9.8                  | 19.2                    | 4.8                    | 6.4             | 8.9          |
| ME.Bubble                           | 1985 cohort                                              | Maine, USA                               | 44.345 | -68.239 | 101.0                | 0.0                                  | 12.9                    | 920.2        | NA                   | 11.9                    | 9.5                    | 1.4             | 3.9          |
| ME.CarltonPond.5310                 | Both cohorts                                             | Maine, USA                               | 44.348 | -69.908 | 101.5                | 33015.1                              | 90.2                    | 2063.5       | 7.3                  | 17.4                    | 5.9                    | 4.3             | 11.6         |
| ME.CathanceLake.9661                | Both cohorts                                             | Maine, USA                               | 44.948 | -67.396 | 65.2                 | 16620.8                              | 1305.9                  | 5316.3       | 7.3                  | 22.9                    | 9.1                    | 4.0             | 4.7          |
| ME.ChickawaukiePond.4822            | Both cohorts                                             | Maine, USA                               | 44.140 | -69.114 | 37.5                 | 3000.0                               | 143.3                   | 1956.5       | 7.3                  | 10.1                    | 3.6                    | 9.4             | 24.0         |
| ME.ChinaLake.5448                   | 1985 cohort                                              | Maine, USA                               | 44.430 | -69.547 | 59.7                 | 43911.8                              | 1594.1                  | 10836.6      | 8.5                  | 25.9                    | 3.5                    | 12.3            | 24.3         |
| ME.Clary(Pleasant)Lake.5382         | Both cohorts                                             | Maine, USA                               | 44.215 | -69.556 | 46.3                 | 20506.1                              | 272.8                   | 4462.4       | 4.3                  | 6.7                     | 3.6                    | 10.2            | 20.3         |
| ME.CobbosseeconteeLake.5236         | Both cohorts                                             | Maine, USA                               | 44.269 | -69.930 | 50.6                 | 25811.8                              | 2232.2                  | 14031.2      | 11.3                 | 30.5                    | 4.0                    | 8.9             | 22.4         |
| ME.CochnewagonPond.3814             | Both cohorts                                             | Maine, USA                               | 44.231 | -70.044 | 82.3                 | 28178.0                              | 159.4                   | 2400.7       | 6.7                  | 8.5                     | 5.5                    | 8.3             | 18.3         |
| ME.ColdRainPond.3376                | 1985 cohort                                              | Maine, USA                               | 43.931 | -70.658 | 153.9                | 42172.3                              | 14.6                    | 613.4        | 3.4                  | 11.0                    | 4.8                    | 4.3             | 13.6         |
| ME.ColdStreamPond.2146              | 1985 cohort                                              | Maine, USA                               | 45.267 | -68.545 | 57.9                 | 80099.9                              | 1464.6                  | 7041.1       | 12.2                 | 31.7                    | 8.8                    | 1.8             | 5.8          |
| ME.Crescent(Rattlesnake)Lake.3696   | 1985 cohort                                              | Maine, USA                               | 43.975 | -70.458 | 84.7                 | 31531.7                              | 284.5                   | 4385.5       | 5.2                  | 16.5                    | 6.4                    | 2.7             | 7.3          |
| ME.CrossLake.1674                   | 1985 cohort                                              | Maine, USA                               | 47.115 | -68.325 | 176.2                | 123014.0                             | 999.6                   | 9005.1       | 6.1                  | 14.0                    | 2.7                    | 11.2            | 19.3         |
| ME.Crystal(Anonymous)Lake.3452      | Both cohorts                                             | Maine, USA                               | 44.126 | -70.672 | 94.5                 | 55682.1                              | 180.5                   | 2479.5       | 10.1                 | 19.8                    | 5.6                    | 2.8             | 8.0          |
| ME.Crystal(Beals)Pond.3626          | 1985 cohort                                              | Maine, USA                               | 44.283 | -70.268 | 100.0                | 45124.8                              | 19.4                    | 554.6        | 4.9                  | 11.9                    | 4.0                    | 6.8             | 14.1         |

|                                           |              |            |        |         |       |          |        |         |      |      |      |      |      |
|-------------------------------------------|--------------|------------|--------|---------|-------|----------|--------|---------|------|------|------|------|------|
| ME.DamariscottaLake.5400                  | Both cohorts | Maine, USA | 44.141 | -69.485 | 16.5  | 14300.3  | 1896.4 | 16533.0 | 9.1  | 34.7 | 5.1  | 4.8  | 10.7 |
| ME.DexterPond.3830                        | Both cohorts | Maine, USA | 44.319 | -70.031 | 73.8  | 34514.5  | 45.7   | 3166.9  | 4.0  | 7.6  | 5.0  | 4.6  | 11.7 |
| ME.DuckpuddlePond.5702                    | Both cohorts | Maine, USA | 44.091 | -69.441 | 23.5  | 7632.2   | 128.7  | 2129.8  | 4.9  | 7.0  | 2.6  | 9.2  | 17.9 |
| ME.Eagle                                  | 1985 cohort  | Maine, USA | 44.363 | -68.251 | 84.0  | 0.0      | 176.8  | 2944.3  | NA   | 33.6 | 10.8 | 1.1  | 2.9  |
| ME.EastPond.5349                          | Both cohorts | Maine, USA | 44.610 | -69.782 | 80.2  | 60104.1  | 694.8  | 4458.0  | 5.5  | 8.2  | 3.9  | 11.4 | 18.4 |
| ME.EchoLake(CrotchedPond).5814            | 1985 cohort  | Maine, USA | 44.440 | -70.022 | 96.9  | 45675.5  | 448.8  | 5070.5  | 6.4  | 35.7 | 6.5  | 2.8  | 6.4  |
| ME.EchoLake.4624                          | 1985 cohort  | Maine, USA | 44.329 | -68.338 | 25.6  | 0.0      | 95.5   | 2688.9  | 8.5  | 20.1 | 8.1  | 2.4  | 4.8  |
| ME.EmbdenPond.78                          | Both cohorts | Maine, USA | 44.940 | -69.952 | 126.5 | 95189.3  | 624.0  | 5804.1  | 18.9 | 54.9 | 9.3  | 2.0  | 4.0  |
| ME.FlyingPond.5182                        | 1985 cohort  | Maine, USA | 44.521 | -69.993 | 105.2 | 53415.8  | 163.1  | 3516.2  | 8.2  | 24.4 | 4.5  | 3.2  | 9.9  |
| ME.GreatPond.5274                         | Both cohorts | Maine, USA | 44.533 | -69.841 | 75.6  | 52000.0  | 3453.2 | 11536.9 | 6.4  | 21.0 | 6.2  | 4.5  | 10.6 |
| ME.GreenLake.4294                         | Both cohorts | Maine, USA | 44.648 | -68.495 | 48.8  | 21569.7  | 1267.5 | 9706.1  | 13.4 | 51.8 | 7.4  | 1.6  | 5.0  |
| ME.HaleyPond.3534                         | Both cohorts | Maine, USA | 44.969 | -70.634 | 464.5 | 121059.0 | 66.4   | 1228.6  | 2.4  | 7.0  | 3.1  | 5.9  | 21.7 |
| ME.HancockPond.3132                       | Both cohorts | Maine, USA | 43.940 | -70.746 | 153.3 | 49421.7  | 308.0  | 3862.2  | 5.2  | 18.0 | 7.2  | 3.1  | 7.9  |
| ME.HealdPond.3222                         | 1985 cohort  | Maine, USA | 44.218 | -70.867 | 143.6 | 74035.5  | 42.9   | 1347.1  | NA   | 5.2  | 4.6  | 4.0  | 9.9  |
| ME.HighlandLake.3454                      | Both cohorts | Maine, USA | 44.080 | -70.738 | 129.5 | 56473.4  | 539.9  | 6841.9  | 5.5  | 15.2 | 6.7  | 3.0  | 9.0  |
| ME.HighlandLake.3734                      | 1985 cohort  | Maine, USA | 43.774 | -70.357 | 57.9  | 13009.6  | 259.0  | 4244.7  | 5.8  | 20.4 | 5.1  | 3.2  | 10.4 |
| ME.HornePond.3408                         | 1985 cohort  | Maine, USA | 43.774 | -70.685 | 85.0  | 37619.8  | 56.3   | 1559.4  | 6.7  | 17.7 | 6.2  | 3.1  | 5.4  |
| ME.Ingalls(Foster's)Pond.3188             | 1985 cohort  | Maine, USA | 43.966 | -70.686 | 143.0 | 46287.1  | 60.3   | 1318.1  | 5.2  | 8.5  | 6.9  | 2.2  | 7.2  |
| ME.IslandPond.3448                        | 1985 cohort  | Maine, USA | 44.160 | -70.643 | 136.6 | 56603.9  | 46.5   | 1002.6  | 4.9  | 14.6 | 5.7  | 3.2  | 9.5  |
| ME.Jordan                                 | 1985 cohort  | Maine, USA | 44.333 | -68.255 | 84.0  | 0.0      | 75.7   | 1881.2  | NA   | 45.7 | 12.7 | 1.0  | 2.9  |
| ME.KennebagoLake.2374                     | 1985 cohort  | Maine, USA | 45.094 | -70.723 | 542.2 | 136504.0 | 713.9  | 8232.5  | 20.7 | 35.4 | 5.4  | 2.7  | 6.0  |
| ME.KeokaLake.3416                         | 1985 cohort  | Maine, USA | 44.180 | -70.706 | 150.6 | 61583.3  | 186.2  | 1969.0  | 7.6  | 12.8 | 5.6  | 4.0  | 11.0 |
| ME.KeysPond.3232                          | Both cohorts | Maine, USA | 44.143 | -70.820 | 154.8 | 65736.2  | 77.3   | 1718.3  | 4.6  | 12.8 | 6.1  | 3.4  | 9.0  |
| ME.KezarLake.97                           | Both cohorts | Maine, USA | 44.186 | -70.903 | 114.9 | 74094.5  | 1078.5 | 11573.3 | 10.4 | 47.2 | 6.2  | 2.6  | 7.3  |
| ME.LakeAnasagunticook.3604                | 1985 cohort  | Maine, USA | 44.426 | -70.324 | 122.5 | 59255.8  | 242.0  | 3040.6  | 8.8  | 16.5 | 4.5  | 4.0  | 9.1  |
| ME.LittleCobbosseecontee.8065             | Both cohorts | Maine, USA | 44.328 | -69.886 | 50.9  | 30232.4  | 36.8   | 769.8   | 5.2  | 10.1 | 3.2  | 12.6 | 72.9 |
| ME.LittleOssipeeLake.5024                 | 1975 cohort  | Maine, USA | 43.611 | -70.699 | 94.8  | 32190.8  | 225.4  | 3672.7  | 6.4  | 22.6 | 7.4  | 2.0  | 6.0  |
| ME.LittlePennesseewassee.367              | Both cohorts | Maine, USA | 44.224 | -70.616 | 165.8 | 60745.4  | 40.5   | 1006.2  | 5.2  | 9.4  | 5.2  | 4.3  | 9.9  |
| ME.LittleSebagoLake.3714                  | Both cohorts | Maine, USA | 43.872 | -70.419 | 86.9  | 22360.7  | 813.0  | 7997.1  | 4.9  | 15.8 | 5.5  | 3.5  | 8.4  |
| ME.LittleWilson(French,Ramsdell)Pond.3784 | 1985 cohort  | Maine, USA | 44.204 | -70.288 | 89.6  | 40635.6  | 45.3   | 1426.0  | 6.7  | 17.1 | 3.8  | 6.0  | 9.2  |
| ME.Long(McWain)Pond.3418                  | 1985 cohort  | Maine, USA | 44.190 | -70.680 | 163.7 | 61320.9  | 180.1  | 3208.1  | 6.7  | 12.8 | 5.7  | 3.1  | 9.3  |
| ME.LongLake.5780                          | Both cohorts | Maine, USA | 44.037 | -70.655 | 81.7  | 48399.4  | 2142.8 | 20816.6 | 7.0  | 18.0 | 6.1  | 2.9  | 7.1  |
| ME.LongPond.3084                          | 1985 cohort  | Maine, USA | 44.001 | -70.857 | 122.2 | 59927.0  | 17.8   | 1054.2  | 2.4  | 5.8  | 5.3  | 2.7  | 7.9  |
| ME.LongPond.4622                          | 1985 cohort  | Maine, USA | 44.327 | -68.362 | 18.6  | 0.0      | 380.0  | 6099.4  | 11.3 | 34.4 | 8.8  | 2.4  | 3.8  |

|                                          |              |            |        |         |       |          |        |         |      |      |     |      |      |
|------------------------------------------|--------------|------------|--------|---------|-------|----------|--------|---------|------|------|-----|------|------|
| ME.LongPond.5272                         | Both cohorts | Maine, USA | 44.506 | -69.914 | 72.5  | 49924.9  | 1034.8 | 13481.3 | 10.7 | 32.3 | 6.3 | 4.6  | 10.0 |
| ME.LovejoyPond.5176                      | 1985 cohort  | Maine, USA | 44.520 | -69.469 | 54.3  | 40003.1  | 153.4  | 2194.3  | 4.6  | 9.8  | 1.7 | 30.5 | 82.7 |
| ME.LowerNarrowsPond.103                  | Both cohorts | Maine, USA | 44.290 | -69.952 | 52.4  | 28284.3  | 90.2   | 3693.0  | 9.4  | 32.3 | 6.8 | 3.2  | 10.2 |
| ME.MadawaskaLake.1802                    | Both cohorts | Maine, USA | 47.025 | -68.218 | 175.9 | 135663.0 | 635.0  | 5222.3  | 4.9  | 11.6 | 3.4 | 5.3  | 19.6 |
| ME.MaranacookLake.5312                   | Both cohorts | Maine, USA | 44.341 | -69.950 | 64.3  | 33301.7  | 746.2  | 9003.4  | 9.1  | 39.0 | 5.4 | 4.5  | 13.8 |
| ME.McGrathPond.5348                      | 1975 cohort  | Maine, USA | 44.556 | -69.766 | 84.4  | 54120.2  | 189.0  | 6768.1  | 4.9  | 8.2  | 5.7 | 5.4  | 10.4 |
| ME.Meduxneag(Drews)Lake.1736             | 1985 cohort  | Maine, USA | 46.096 | -68.030 | 147.5 | 120035.0 | 463.0  | 4502.8  | 5.5  | 14.9 | 5.3 | 3.6  | 8.6  |
| ME.MegunticookLake.4852                  | 1985 cohort  | Maine, USA | 44.257 | -69.106 | 43.0  | 6500.0   | 537.4  | 4982.4  | 7.0  | 19.5 | 5.8 | 4.4  | 10.1 |
| ME.MessalonskeeLake.5280                 | Both cohorts | Maine, USA | 44.479 | -69.789 | 71.3  | 45697.4  | 1493.7 | 17827.1 | 10.1 | 34.4 | 5.4 | 4.0  | 11.6 |
| ME.MiddleRangePond.3762                  | 1985 cohort  | Maine, USA | 44.027 | -70.379 | 93.3  | 31484.1  | 154.6  | 6569.6  | 8.8  | 20.1 | 6.2 | 4.0  | 7.9  |
| ME.Mooselookmeguntic(Cupsuptic)Lake.3302 | 1985 cohort  | Maine, USA | 44.914 | -70.805 | 447.1 | 124677.0 | 6620.3 | 22900.2 | 18.3 | 40.2 | 5.4 | 4.1  | 6.2  |
| ME.MoosePond.2590                        | Both cohorts | Maine, USA | 44.930 | -69.523 | 74.7  | 69348.8  | 1560.5 | 8051.5  | 5.5  | 15.2 | 4.8 | 4.3  | 10.2 |
| ME.MoosePond.3134                        | Both cohorts | Maine, USA | 44.042 | -70.796 | 127.4 | 57723.5  | 686.8  | 8298.8  | 6.7  | 21.3 | 6.4 | 3.0  | 6.9  |
| ME.MoosePond.3424                        | 1985 cohort  | Maine, USA | 44.137 | -70.741 | 166.1 | 60623.8  | 78.9   | 1837.2  | 6.7  | 13.1 | 7.2 | 2.3  | 7.3  |
| ME.MountainyPond.4292                    | 1985 cohort  | Maine, USA | 44.717 | -68.534 | 81.4  | 24150.6  | 282.5  | 4334.4  | 6.1  | 10.4 | 9.1 | 1.4  | 4.4  |
| ME.MousamLake.3838                       | Both cohorts | Maine, USA | 43.507 | -70.859 | 145.7 | 32500.0  | 397.4  | 6891.7  | 5.2  | 29.9 | 6.5 | 3.7  | 7.8  |
| ME.NequassetLake.5222                    | 1985 cohort  | Maine, USA | 43.953 | -69.774 | 5.2   | 500.0    | 188.2  | 2836.2  | 9.1  | 19.2 | 3.9 | 3.9  | 15.6 |
| ME.NorthLake(LittlePond).5344            | Both cohorts | Maine, USA | 44.628 | -69.842 | 77.4  | 62393.9  | 1024.3 | 5127.3  | 4.0  | 6.1  | 4.0 | 4.7  | 17.8 |
| ME.NorthPond.3500                        | Both cohorts | Maine, USA | 44.262 | -70.591 | 148.4 | 62500.0  | 110.5  | 1088.9  | 1.8  | 3.0  | 2.9 | 5.9  | 17.4 |
| ME.OtterPond.3458                        | 1985 cohort  | Maine, USA | 44.022 | -70.677 | 119.5 | 48708.3  | 36.4   | 1195.1  | 3.0  | 6.4  | 3.5 | 4.7  | 13.8 |
| ME.PantherPond.3694                      | 1985 cohort  | Maine, USA | 43.928 | -70.465 | 84.4  | 28935.3  | 573.4  | 4675.8  | 7.9  | 20.7 | 6.9 | 2.7  | 7.2  |
| ME.PapoosePond.3414                      | 1985 cohort  | Maine, USA | 44.232 | -70.713 | 145.4 | 66153.2  | 28.3   | 988.8   | 2.1  | 4.6  | 3.5 | 6.8  | 13.8 |
| ME.ParkerPond.5186                       | 1985 cohort  | Maine, USA | 44.494 | -70.031 | 109.1 | 51470.9  | 616.7  | 6089.8  | 9.4  | 23.2 | 7.2 | 2.5  | 7.3  |
| ME.PeabodyPond.3374                      | Both cohorts | Maine, USA | 43.945 | -70.688 | 146.3 | 45304.5  | 299.5  | 2885.8  | 9.8  | 19.5 | 7.3 | 2.7  | 7.0  |
| ME.PemaquidPond.5704                     | Both cohorts | Maine, USA | 44.060 | -69.453 | 23.5  | 6519.2   | 622.0  | 10230.4 | 6.1  | 18.6 | 4.6 | 4.3  | 10.6 |
| ME.PennesseewasseeLake.3434              | Both cohorts | Maine, USA | 44.230 | -70.583 | 121.0 | 59518.9  | 399.4  | 6189.1  | 5.5  | 14.6 | 5.8 | 4.3  | 9.1  |
| ME.PleasantLake.3446                     | Both cohorts | Maine, USA | 44.037 | -70.522 | 129.8 | 40065.6  | 539.0  | 6074.8  | 8.8  | 18.9 | 8.5 | 2.2  | 5.0  |
| ME.PleasantPond.3822                     | Both cohorts | Maine, USA | 44.319 | -70.225 | 116.1 | 45169.1  | 77.3   | 1946.9  | 9.1  | 20.7 | 5.8 | 4.6  | 10.3 |
| ME.QuimbyPond.3526                       | 1985 cohort  | Maine, USA | 44.989 | -70.742 | 512.7 | 128103.0 | 63.5   | 1043.9  | 1.8  | 3.7  | 2.2 | 5.5  | 12.7 |
| ME.Rangeley(Oquossoc)Lake.3300           | 1985 cohort  | Maine, USA | 44.946 | -70.699 | 462.7 | 122100.0 | 2550.3 | 12229.8 | 18.3 | 45.4 | 6.8 | 2.0  | 5.7  |
| ME.RaymondPond.3690                      | 1985 cohort  | Maine, USA | 43.969 | -70.427 | 93.6  | 29334.3  | 139.2  | 1858.8  | 4.3  | 12.8 | 6.1 | 3.9  | 7.7  |
| ME.SabattusPond.3796                     | Both cohorts | Maine, USA | 44.144 | -70.103 | 74.1  | 24829.4  | 798.4  | 6145.6  | 4.3  | 5.8  | 2.1 | 36.6 | 42.8 |
| ME.SabbathdayLake.3700                   | 1985 cohort  | Maine, USA | 43.978 | -70.354 | 91.1  | 26500.0  | 138.4  | 2598.2  | 7.3  | 20.7 | 6.5 | 4.1  | 8.3  |
| ME.SaddlebackLake.3536                   | 1985 cohort  | Maine, USA | 44.970 | -70.561 | 532.5 | 118222.0 | 136.0  | 1715.0  | 2.7  | 4.3  | 3.4 | 3.4  | 9.9  |
| ME.SalmonPond(EllisPond).5352            | Both cohorts | Maine, USA | 44.528 | -69.780 | 84.4  | 51244.5  | 281.3  | 6768.1  | 7.0  | 17.4 | 5.0 | 5.8  | 35.3 |

|                                  |              |                    |        |         |       |          |        |         |      |      |      |      |      |
|----------------------------------|--------------|--------------------|--------|---------|-------|----------|--------|---------|------|------|------|------|------|
| ME.Sand(Walden)Pond.3130         | 1985 cohort  | Maine, USA         | 43.954 | -70.767 | 153.3 | 51548.5  | 100.4  | 3862.2  | 3.7  | 13.4 | 6.2  | 3.6  | 9.4  |
| ME.SandPond(TacomaLakes).5238    | Both cohorts | Maine, USA         | 44.181 | -69.970 | 53.6  | 19678.7  | 112.9  | 6711.5  | 9.4  | 25.0 | 6.6  | 3.0  | 7.1  |
| ME.SandPond.3432                 | Both cohorts | Maine, USA         | 44.201 | -70.611 | 155.1 | 58523.5  | 55.0   | 1393.8  | 6.7  | 17.1 | 7.3  | 2.6  | 6.3  |
| ME.SealCovePond.4630             | 1985 cohort  | Maine, USA         | 44.302 | -68.397 | 12.2  | 0.0      | 103.2  | 2781.1  | 5.5  | 13.4 | 6.7  | 3.0  | 6.5  |
| ME.SeabasticookLake.2264         | Both cohorts | Maine, USA         | 44.858 | -69.238 | 61.0  | 47636.6  | 1836.1 | 7527.2  | 6.1  | 15.2 | 2.2  | 26.6 | 95.4 |
| ME.SewallPond.9943               | 1985 cohort  | Maine, USA         | 43.870 | -69.781 | 3.0   | 0.0      | 18.6   | 785.1   | 2.7  | 3.4  | 1.6  | 31.3 | 51.5 |
| ME.SquarePond.3916               | Both cohorts | Maine, USA         | 43.557 | -70.886 | 159.4 | 37423.3  | 354.9  | 3417.8  | 6.1  | 13.4 | 6.4  | 2.6  | 9.1  |
| ME.StearnsPond.3234              | 1985 cohort  | Maine, USA         | 44.122 | -70.777 | 134.1 | 61465.4  | 100.4  | 1509.6  | 8.2  | 14.3 | 5.1  | 3.4  | 10.1 |
| ME.StGeorgeLake.9971             | Both cohorts | Maine, USA         | 44.386 | -69.335 | 155.1 | 26800.2  | 420.9  | 3116.5  | 7.3  | 19.8 | 8.5  | 1.6  | 6.7  |
| ME.SwanLake(GoosePond).5492      | Both cohorts | Maine, USA         | 44.548 | -68.990 | 61.3  | 11335.8  | 561.7  | 5113.3  | 10.4 | 26.5 | 7.1  | 2.1  | 6.0  |
| ME.TaylorPond.3750               | Both cohorts | Maine, USA         | 44.107 | -70.279 | 73.2  | 34340.2  | 264.3  | 3052.1  | 5.2  | 13.4 | 4.7  | 4.2  | 10.7 |
| ME.ThomasPond.3392               | 1985 cohort  | Maine, USA         | 43.921 | -70.507 | 85.0  | 30923.3  | 215.7  | 1997.0  | 6.7  | 19.5 | 6.3  | 3.1  | 7.9  |
| ME.ThompsonLake(TheHeath).3444   | Both cohorts | Maine, USA         | 44.069 | -70.490 | 99.1  | 40917.6  | 1788.3 | 13662.6 | 10.7 | 36.9 | 8.8  | 2.9  | 4.9  |
| ME.ThreemilePond.5416            | Both cohorts | Maine, USA         | 44.367 | -69.605 | 54.9  | 35672.1  | 475.1  | 4231.6  | 5.2  | 11.3 | 2.9  | 16.9 | 24.6 |
| ME.TogusPond.9931                | Both cohorts | Maine, USA         | 44.324 | -69.658 | 55.2  | 30016.7  | 272.8  | 6659.7  | 6.1  | 14.9 | 4.1  | 14.3 | 36.2 |
| ME.ToothakerPond.2336            | 1975 cohort  | Maine, USA         | 44.869 | -70.397 | 242.0 | 101823.0 | 9.3    | 635.2   | 3.4  | 6.1  | 2.9  | 12.2 | 19.2 |
| ME.Torsey(Greeley)Lake.5307      | Both cohorts | Maine, USA         | 44.421 | -69.986 | 80.2  | 42956.4  | 274.8  | 5187.9  | 4.6  | 13.7 | 5.9  | 4.1  | 16.7 |
| ME.TrickyPond.3382               | Both cohorts | Maine, USA         | 43.940 | -70.608 | 112.5 | 39131.2  | 127.5  | 20816.6 | 10.1 | 17.4 | 10.1 | 1.6  | 7.2  |
| ME.TrippPond.3758                | Both cohorts | Maine, USA         | 44.052 | -70.433 | 93.3  | 36472.6  | 297.4  | 4162.0  | 3.4  | 10.7 | 4.6  | 5.9  | 9.3  |
| ME.UnityPond(WinnecookLake).5172 | Both cohorts | Maine, USA         | 44.647 | -69.332 | 53.0  | 36117.9  | 1039.6 | 6504.0  | 6.7  | 12.5 | 2.1  | 17.8 | 28.3 |
| ME.UpperPleasant(Mud)Pond.5254   | Both cohorts | Maine, USA         | 44.169 | -69.855 | 41.1  | 13086.3  | 322.5  | 15338.5 | 3.0  | 7.9  | 3.1  | 8.9  | 40.5 |
| ME.UpperRangePond.3688           | 1975 cohort  | Maine, USA         | 44.005 | -70.399 | 93.3  | 30927.3  | 144.5  | 6569.6  | 6.1  | 11.6 | 6.3  | 4.0  | 7.5  |
| ME.WalkerPond.4640               | 1985 cohort  | Maine, USA         | 44.331 | -68.694 | 7.0   | 2000.0   | 280.4  | 3365.3  | 9.1  | 14.3 | 7.4  | 2.4  | 10.1 |
| ME.WashingtonPond.4894           | 1985 cohort  | Maine, USA         | 44.293 | -69.372 | 98.1  | 27829.8  | 228.6  | 4416.8  | 4.9  | 11.0 | 6.7  | 2.7  | 5.7  |
| ME.Webb(Weld)Lake.3672           | Both cohorts | Maine, USA         | 44.695 | -70.446 | 206.7 | 87900.5  | 887.9  | 7327.5  | 7.3  | 12.8 | 5.0  | 3.4  | 9.4  |
| ME.WebberPond.5408               | Both cohorts | Maine, USA         | 44.411 | -69.656 | 36.6  | 39051.3  | 499.0  | 3848.6  | 5.5  | 12.5 | 2.8  | 14.1 | 35.5 |
| ME.WesserunsettLake.70           | 1985 cohort  | Maine, USA         | 44.840 | -69.768 | 102.1 | 77001.6  | 568.2  | 4753.3  | 4.3  | 6.7  | 5.8  | 4.1  | 7.3  |
| ME.WilsonLake.3920               | 1985 cohort  | Maine, USA         | 43.558 | -70.938 | 175.0 | 40770.7  | 124.6  | 1534.3  | 5.2  | 13.4 | 5.8  | 3.1  | 7.6  |
| ME.WilsonPond.3832               | Both cohorts | Maine, USA         | 44.295 | -70.049 | 73.8  | 33143.6  | 238.0  | 5197.4  | 7.0  | 12.8 | 4.9  | 6.5  | 23.8 |
| ME.WoodsPond.3456                | Both cohorts | Maine, USA         | 44.033 | -70.736 | 138.4 | 53502.3  | 187.0  | 3443.9  | 4.6  | 8.8  | 4.8  | 3.2  | 8.8  |
| ME.WorthleyPond.3594             | 1975 cohort  | Maine, USA         | 44.459 | -70.400 | 174.0 | 65964.0  | 151.8  | 2800.1  | 7.6  | 14.9 | 6.7  | 3.2  | 6.6  |
| NH.ARMINGTONLAKE.ARMPIED         | 1985 cohort  | New Hampshire, USA | 43.958 | -71.969 | 406.6 | 134623.0 | 57.6   | 1760.1  | 3.7  | 9.7  | 6.0  | 2.1  | 5.4  |
| NH.ASHUELOTPOND.ASHWASD          | 1985 cohort  | New Hampshire, USA | 43.150 | -72.149 | 440.4 | 112504.0 | 121.2  | 1623.9  | 1.8  | 7.0  | 3.2  | 5.0  | 11.4 |
| NH.AYERSPOND.AYEBARD             | 1985 cohort  | New Hampshire, USA | 43.256 | -71.043 | 71.0  | 30083.2  | 92.1   | 2387.3  | 4.4  | 9.1  | 4.9  | 3.5  | 8.1  |
| NH.BAXTERLAKE.BAXFARD            | 1985 cohort  | New Hampshire, USA | 43.327 | -71.043 | 123.4 | 35107.0  | 119.3  | 1398.1  | 2.1  | 4.6  | 2.7  | 4.7  | 12.9 |

|                              |             |                    |        |         |       |          |        |         |      |      |     |     |      |
|------------------------------|-------------|--------------------|--------|---------|-------|----------|--------|---------|------|------|-----|-----|------|
| NH.BLAISDELLLAKE.BLASUTD     | 1985 cohort | New Hampshire, USA | 43.288 | -71.937 | 252.1 | 100125.0 | 64.1   | 1606.6  | 5.4  | 13.1 | 5.5 | 3.7 | 6.8  |
| NH.BROADBAY.BROOSSD          | 1985 cohort | New Hampshire, USA | 43.804 | -71.101 | 123.7 | 68856.7  | 187.7  | 3562.6  | 8.3  | 22.3 | 4.6 | 2.7 | 7.6  |
| NH.CANAANSTREETLAKE.CANCAND  | 1985 cohort | New Hampshire, USA | 43.664 | -72.034 | 348.1 | 122362.0 | 122.6  | 1766.8  | 3.4  | 6.7  | 4.6 | 2.7 | 7.3  |
| NH.CENTERPOND.CENSTDD        | 1985 cohort | New Hampshire, USA | 43.064 | -72.128 | 402.0 | 108960.0 | 34.4   | 878.8   | 3.9  | 8.5  | 3.1 | 6.7 | 9.4  |
| NH.CHALKPOND.CHANBYD         | 1985 cohort | New Hampshire, USA | 43.348 | -72.010 | 381.6 | 107500.0 | 8.5    | 649.0   | 2.0  | 3.6  | 3.2 | 3.7 | 7.9  |
| NH.CHASEPOND.CHAWLMD         | 1985 cohort | New Hampshire, USA | 43.416 | -71.911 | 214.6 | 101708.0 | 15.8   | 580.6   | 1.9  | 3.4  | 2.8 | 5.0 | 10.5 |
| NH.CLOUGHSPOND.CLOLOUD       | 1985 cohort | New Hampshire, USA | 43.325 | -71.497 | 142.0 | 66727.1  | 18.5   | 634.7   | NA   | 18.2 | 4.6 | 6.6 | 9.0  |
| NH.COBBETTSPOND.COBWIND      | 1985 cohort | New Hampshire, USA | 42.789 | -71.294 | 53.9  | 39689.4  | 139.5  | 2967.6  | 5.2  | 19.2 | 3.9 | 4.7 | 10.0 |
| NH.CRYSTALLAKE.CRYGLMD       | 1985 cohort | New Hampshire, USA | 43.443 | -71.311 | 189.9 | 59887.4  | 178.4  | 2974.1  | 5.0  | 16.2 | 4.8 | 4.2 | 9.0  |
| NH.DEERINGRESERVOIR.DEEDRGD  | 1985 cohort | New Hampshire, USA | 43.057 | -71.844 | 280.7 | 86117.6  | 127.6  | 2122.2  | 3.5  | 11.3 | 5.9 | 3.3 | 7.2  |
| NH.DUTCHMANPOND.DUTSPRD      | 1985 cohort | New Hampshire, USA | 43.455 | -72.023 | 470.3 | 111824.0 | 11.3   | 487.4   | 1.9  | 3.0  | 2.5 | 1.6 | 10.0 |
| NH.EASTMANPOND.EASGTMD       | 1985 cohort | New Hampshire, USA | 43.521 | -72.116 | 333.8 | 121254.0 | 135.6  | 2772.9  | 3.0  | 9.2  | 3.2 | 6.3 | 9.2  |
| NH.FORESTLAKE.FORDALD        | 1985 cohort | New Hampshire, USA | 44.349 | -71.671 | 337.1 | 135426.0 | 77.6   | 1456.9  | 3.0  | 6.4  | 3.8 | 4.3 | 8.2  |
| NH.FORESTLAKE.FORWCHD        | 1985 cohort | New Hampshire, USA | 42.796 | -72.366 | 135.0 | 118302.0 | 35.2   | 1123.4  | 4.7  | 9.8  | 3.3 | 8.5 | 11.7 |
| NH.GOVERNORSLAKE.GOVRAYD     | 1985 cohort | New Hampshire, USA | 43.056 | -71.185 | 81.4  | 35128.3  | 21.1   | 884.4   | 1.9  | 3.0  | 1.8 | 9.0 | 22.1 |
| NH.GRANITELAKE.GRASTDD       | 1985 cohort | New Hampshire, USA | 43.021 | -72.141 | 389.5 | 108969.0 | 92.2   | 1644.0  | 9.8  | 28.9 | 8.7 | 1.3 | 4.5  |
| NH.HALFMOONLAKE.HALALTD      | 1985 cohort | New Hampshire, USA | 43.391 | -71.228 | 195.1 | 50975.5  | 102.4  | 2047.9  | 4.4  | 8.2  | 3.8 | 4.0 | 9.5  |
| NH.HARRISVILLEPOND.HARHARD   | 1985 cohort | New Hampshire, USA | 42.949 | -72.099 | 401.7 | 105220.0 | 48.6   | 1296.9  | 4.7  | 12.5 | 4.0 | 5.7 | 7.1  |
| NH.HIGHLANDLAKE.HIGANDD      | 1985 cohort | New Hampshire, USA | 43.458 | -71.759 | 196.6 | 92070.6  | 85.4   | 1395.5  | 5.0  | 13.4 | 4.4 | 3.9 | 8.1  |
| NH.HIGHLANDLAKE.HIGSTDND     | 1985 cohort | New Hampshire, USA | 43.126 | -72.081 | 394.4 | 106519.0 | 288.1  | 7690.7  | 2.4  | 9.1  | 2.7 | 5.4 | 11.5 |
| NH.HILLSPOND.HILALTD         | 1985 cohort | New Hampshire, USA | 43.481 | -71.303 | 246.6 | 61953.6  | 55.7   | 885.5   | 5.5  | 12.8 | 3.4 | 6.8 | 9.0  |
| NH.HubbardBrook.Mirror       | 1985 cohort | New Hampshire, USA | 43.944 | -71.693 | 213.0 | 115053.0 | 15.0   | 535.3   | 5.8  | 11.0 | 5.5 | 2.0 | 5.0  |
| NH.ISLANDPOND.ISLDERD        | 1985 cohort | New Hampshire, USA | 42.866 | -71.211 | 62.5  | 32423.0  | 201.5  | 2908.6  | 4.5  | 24.3 | 4.0 | 5.2 | 10.7 |
| NH.ISLANDPOND.ISLSTDVLAPD    | 1985 cohort | New Hampshire, USA | 43.069 | -72.087 | 390.4 | 105842.0 | 63.9   | 1492.5  | 2.4  | 4.5  | 3.0 | 6.1 | 11.4 |
| NH.KEZARLAKE.KEZSUTD         | 1985 cohort | New Hampshire, USA | 43.361 | -71.950 | 276.1 | 103000.0 | 73.5   | 1051.0  | 2.7  | 8.2  | 2.8 | 6.1 | 13.8 |
| NH.KOLELEMOOKLAKE.KOLSPRD    | 1985 cohort | New Hampshire, USA | 43.489 | -72.042 | 422.8 | 114579.0 | 40.0   | 1077.4  | 4.1  | 6.7  | 5.1 | 2.4 | 7.1  |
| NH.LAKEWINNISQUAM.WINPLACD   | 1985 cohort | New Hampshire, USA | 43.541 | -71.505 | 146.9 | 78832.1  | 1725.7 | 14679.4 | 15.2 | 53.0 | 7.8 | 2.2 | 6.4  |
| NH.LAKEWINONA.WINNWHD        | 1985 cohort | New Hampshire, USA | 43.675 | -71.567 | 164.6 | 90902.4  | 62.5   | 1868.1  | 6.6  | 14.6 | 5.4 | 4.3 | 7.0  |
| NH.LAURELLAKE.LAUFITD        | 1985 cohort | New Hampshire, USA | 42.739 | -72.153 | 335.0 | 99791.0  | 62.7   | 1502.6  | 6.1  | 13.4 | 5.8 | 3.6 | 6.1  |
| NH.LEAVITTBAY.LEAOSSD        | 1985 cohort | New Hampshire, USA | 43.797 | -71.081 | 123.7 | 67314.6  | 71.3   | 3562.6  | 3.4  | 12.8 | 4.5 | 2.4 | 6.9  |
| NH.LONGPOND.LONLEMD          | 1985 cohort | New Hampshire, USA | 43.184 | -72.155 | 471.8 | 114001.0 | 48.6   | 1404.0  | 4.8  | 20.3 | 8.8 | 1.7 | 4.3  |
| NH.LOONLAKE.LOOLPYD          | 1985 cohort | New Hampshire, USA | 43.795 | -71.755 | 149.0 | 110477.0 | 45.3   | 1032.2  | 3.9  | 8.8  | 3.9 | 3.3 | 9.0  |
| NH.LOWERSUNCOOKPOND.SUNLBRND | 1985 cohort | New Hampshire, USA | 43.375 | -71.272 | 167.9 | 52825.2  | 99.3   | 1666.2  | 2.9  | 4.9  | 3.3 | 3.5 | 10.8 |
| NH.LSPA.Sunapee              | 1985 cohort | New Hampshire, USA | 43.392 | -72.062 | 333.0 | 112501.0 | 1660.0 | 11911.1 | 10.0 | 33.7 | 8.5 | 1.7 | 5.0  |
| NH.MASSASECUMLAKE.MASBRAD    | 1985 cohort | New Hampshire, USA | 43.243 | -71.913 | 192.3 | 96918.8  | 162.6  | 2273.0  | 3.9  | 15.2 | 5.1 | 3.2 | 6.7  |

|                              |              |                    |        |         |       |          |       |        |      |      |      |      |      |
|------------------------------|--------------|--------------------|--------|---------|-------|----------|-------|--------|------|------|------|------|------|
| NH.MOUNTAINVIEWLAKE.MOUSUND  | 1985 cohort  | New Hampshire, USA | 43.343 | -72.078 | 340.2 | 112518.0 | 42.4  | 867.7  | 4.1  | 6.7  | 3.3  | 4.4  | 12.5 |
| NH.NUBANUSITLAKE.NUBNELD     | 1985 cohort  | New Hampshire, USA | 42.986 | -72.058 | 419.4 | 101845.0 | 289.4 | 4064.2 | 11.5 | 30.2 | 10.1 | 1.3  | 4.9  |
| NH.OTTERPOND.OTTSUND         | 1985 cohort  | New Hampshire, USA | 43.433 | -72.057 | 342.9 | 113633.0 | 74.9  | 1371.9 | 4.0  | 7.6  | 3.7  | 3.4  | 9.6  |
| NH.PARTRIDGELAKE.PARLTLD     | 1985 cohort  | New Hampshire, USA | 44.310 | -71.883 | 257.9 | 149111.0 | 42.1  | 1243.6 | 5.8  | 15.2 | 4.9  | 8.2  | 9.7  |
| NH.PAWTUCKAWAYLAKE.PAWNOTND  | 1985 cohort  | New Hampshire, USA | 43.087 | -71.138 | 76.2  | 32760.5  | 364.2 | 4306.3 | 2.9  | 15.2 | 3.3  | 5.2  | 13.2 |
| NH.PEARLYLAKE.PEARIND        | 1985 cohort  | New Hampshire, USA | 42.770 | -72.065 | 306.6 | 94853.8  | 57.6  | 1758.7 | 2.0  | 3.4  | 1.2  | 13.0 | 30.2 |
| NH.PERKINSPOND.PERSUND       | 1985 cohort  | New Hampshire, USA | 43.410 | -72.117 | 329.8 | 117510.0 | 63.5  | 1229.2 | 1.4  | 2.7  | 2.4  | 6.6  | 11.0 |
| NH.PINERIVERPOND.PINWAKD     | 1985 cohort  | New Hampshire, USA | 43.629 | -71.028 | 178.0 | 51346.9  | 240.4 | 4967.3 | 3.7  | 16.8 | 5.2  | 3.6  | 7.1  |
| NH.PLEASANTLAKE.PLEDEED      | 1985 cohort  | New Hampshire, USA | 43.192 | -71.262 | 176.2 | 44502.8  | 199.7 | 2645.5 | 7.0  | 19.8 | 6.3  | 3.0  | 5.5  |
| NH.PROVINCELAKE.PROEFFD      | 1985 cohort  | New Hampshire, USA | 43.694 | -70.993 | 146.3 | 54150.3  | 410.4 | 2739.9 | 2.8  | 4.9  | 2.5  | 3.8  | 15.5 |
| NH.RANDPOND.RANGOSD          | 1985 cohort  | New Hampshire, USA | 43.319 | -72.108 | 383.1 | 114110.0 | 15.7  | 703.8  | 3.4  | 8.2  | 4.1  | 3.2  | 8.8  |
| NH.ROCKPOND.ROCWIND          | 1985 cohort  | New Hampshire, USA | 42.770 | -71.302 | 46.6  | 40326.8  | 14.0  | 1091.2 | 3.0  | 8.2  | 4.9  | 4.2  | 8.6  |
| NH.ROCKYBOUNDPOND.ROCCROD    | 1985 cohort  | New Hampshire, USA | 43.446 | -72.145 | 321.6 | 120604.0 | 26.1  | 726.1  | 4.5  | 9.1  | 5.1  | 2.8  | 7.9  |
| NH.RUSTPOND.RUSWOLD          | 1985 cohort  | New Hampshire, USA | 43.562 | -71.165 | 176.5 | 56515.5  | 85.0  | 2045.4 | 7.4  | 12.2 | 5.0  | 3.1  | 7.7  |
| NH.SANDPOND.SANMLWD          | 1985 cohort  | New Hampshire, USA | 43.184 | -72.167 | 470.3 | 115000.0 | 64.4  | 1167.2 | 6.2  | 18.3 | 8.4  | 2.0  | 5.6  |
| NH.SEBBINSPOND.SEBBEDD       | 1985 cohort  | New Hampshire, USA | 42.928 | -71.478 | 59.4  | 54520.6  | 8.0   | 438.5  | 3.4  | 7.0  | 2.7  | 19.7 | 16.3 |
| NH.SPOFFORDLAKE.SPOCHED      | 1985 cohort  | New Hampshire, USA | 42.917 | -72.440 | 218.2 | 129294.0 | 286.0 | 2679.6 | 9.1  | 19.5 | 8.5  | 2.1  | 6.2  |
| NH.STINSONLAKE.STIRUMD       | 1985 cohort  | New Hampshire, USA | 43.868 | -71.799 | 397.2 | 117581.0 | 141.6 | 2001.4 | 10.6 | 23.5 | 7.2  | 1.6  | 4.9  |
| NH.STOCKERPOND.STOGTMD       | 1985 cohort  | New Hampshire, USA | 43.483 | -72.110 | 310.6 | 119379.0 | 25.7  | 1199.5 | 2.7  | 5.8  | 2.5  | 5.6  | 9.5  |
| NH.SUNSETLAKE.SUNALTD        | 1985 cohort  | New Hampshire, USA | 43.474 | -71.310 | 246.3 | 61987.9  | 83.0  | 1931.5 | 5.6  | 23.7 | NA   | NA   | NA   |
| NH.SWANZEYLAKE.SWASWAD       | 1985 cohort  | New Hampshire, USA | 42.846 | -72.303 | 159.7 | 116010.0 | 47.4  | 1362.0 | 6.9  | 16.2 | 4.6  | 3.5  | 6.7  |
| NH.THORNDIKEPOND.THOJAFD     | 1985 cohort  | New Hampshire, USA | 42.860 | -72.055 | 353.3 | 99454.8  | 107.2 | 2360.3 | 3.4  | 7.0  | 3.7  | 4.3  | 8.7  |
| NH.TODDLAKE.TODNBYD          | 1985 cohort  | New Hampshire, USA | 43.280 | -71.968 | 204.2 | 102176.0 | 68.1  | 2009.6 | 2.2  | 6.1  | 2.8  | 4.4  | 12.2 |
| NH.TOMPOND.TOMWRND           | 1985 cohort  | New Hampshire, USA | 43.251 | -71.755 | 116.7 | 84647.8  | 12.8  | 757.4  | 2.5  | 4.1  | 2.8  | 10.6 | 10.8 |
| NH.TUCKERPOND.TUCSBYD        | 1985 cohort  | New Hampshire, USA | 43.338 | -71.803 | 205.7 | 91001.4  | 22.9  | 735.3  | 2.0  | 6.7  | 3.9  | 4.2  | 10.9 |
| NH.UPPERSUNCOOKPOND.SUNUBRND | 1985 cohort  | New Hampshire, USA | 43.391 | -71.288 | 167.9 | 55183.8  | 140.3 | 2398.2 | 5.6  | 13.1 | 3.6  | 3.2  | 11.0 |
| NH.WEBSTERLAKE.WEBFRKD       | 1985 cohort  | New Hampshire, USA | 43.467 | -71.683 | 122.2 | 87173.7  | 247.8 | 2451.7 | 5.5  | 11.8 | 4.1  | 4.2  | 12.1 |
| NH.WHITEOAKPOND.WHIHOLD      | 1985 cohort  | New Hampshire, USA | 43.718 | -71.558 | 177.7 | 92532.4  | 117.8 | 1603.3 | 4.0  | 10.7 | 3.5  | 4.9  | 9.0  |
| NY.ADK.EastLake              | Both cohorts | New York, USA      | 43.695 | -74.896 | 554.0 | 277032.0 | 13.4  | 512.6  | 4.8  | 11.6 | 3.0  | 3.8  | 7.6  |
| NY.ADK.FirstBisbyLake        | Both cohorts | New York, USA      | 43.602 | -74.937 | 618.0 | 268224.0 | 62.3  | 1897.3 | 11.6 | 30.8 | 9.0  | 0.6  | 3.4  |
| NY.ADK.HonedagaLake          | Both cohorts | New York, USA      | 43.524 | -74.815 | 667.0 | 256816.0 | 331.0 | 6172.1 | 15.3 | 57.9 | 16.5 | 0.3  | 1.9  |
| NY.ADK.LittleMooseLake       | Both cohorts | New York, USA      | 43.692 | -74.925 | 545.0 | 277597.0 | 271.5 | 3033.7 | 15.0 | 39.3 | 7.3  | 1.3  | 4.7  |
| NY.ADK.LowerSylvanPond       | 1985 cohort  | New York, USA      | 43.609 | -74.939 | 622.0 | 268910.0 | 6.5   | 349.6  | 2.5  | 4.6  | 4.0  | 3.7  | 7.4  |
| NY.ADK.PantherLake           | Both cohorts | New York, USA      | 43.680 | -74.922 | 557.0 | 276049.0 | 17.4  | 792.0  | 4.1  | 7.0  | 4.7  | 2.0  | 7.0  |
| NY.ADK.RockLake              | 1985 cohort  | New York, USA      | 43.968 | -74.869 | 546.0 | 305739.0 | 76.9  | 2074.8 | NA   | 6.1  | 4.6  | 1.2  | 3.0  |

|                     |              |                   |        |         |       |          |         |         |      |      |     |      |      |
|---------------------|--------------|-------------------|--------|---------|-------|----------|---------|---------|------|------|-----|------|------|
| NY.CanadaragoLake   | 1985 cohort  | New York, USA     | 42.814 | -75.007 | 385.0 | 189275.0 | 760.0   | 5730.8  | 10.1 | 13.0 | 3.9 | 4.3  | 11.0 |
| NY.Honeoye          | 1985 cohort  | New York, USA     | 42.750 | -77.517 | 245.0 | 334569.0 | 717.0   | 7222.1  | 4.9  | 9.1  | 3.1 | 29.9 | 62.1 |
| NY.LakeGeorge       | Both cohorts | New York, USA     | 43.433 | -73.691 | 98.0  | 237741.0 | 11000.0 | 51268.6 | 21.3 | 60.0 | 8.9 | 1.5  | 4.9  |
| NY.Mohonk           | 1985 cohort  | New York, USA     | 41.766 | -74.157 | 379.0 | 54801.9  | 6.9     | 571.3   | 6.5  | 18.0 | 6.4 | 2.1  | 25.0 |
| NY.NorthChautauqua  | 1985 cohort  | New York, USA     | 42.217 | -79.445 | 399.0 | 406370.0 | 2856.0  | 27313.6 | 7.6  | 22.9 | 3.5 | 20.1 | 50.0 |
| NY.Oneida           | Both cohorts | New York, USA     | 43.200 | -75.900 | 112.0 | 264909.0 | 20700.0 | 39408.2 | 6.8  | 16.8 | 2.9 | 8.0  | 27.3 |
| NY.SouthChautauqua  | 1985 cohort  | New York, USA     | 42.133 | -79.365 | 399.0 | 394731.0 | 2468.0  | 27313.6 | 3.4  | 5.8  | 1.5 | 42.3 | 65.0 |
| NY.UpperSaranac     | 1985 cohort  | New York, USA     | 44.253 | -74.325 | 470.0 | 316241.0 | 2167.0  | 12165.1 | 14.0 | 27.0 | 3.5 | 4.2  | 10.1 |
| ON.BlueChalk        | Both cohorts | Ontario, CA       | 45.199 | -78.938 | 343.5 | 592105.0 | 52.4    | 1362.5  | 8.5  | 23.0 | NA  | NA   | NA   |
| ON.Chub             | Both cohorts | Ontario, CA       | 45.213 | -78.984 | 371.0 | 595680.0 | 34.4    | 1334.1  | 8.9  | 27.0 | NA  | NA   | NA   |
| ON.Crosson          | Both cohorts | Ontario, CA       | 45.084 | -79.037 | 332.0 | 588134.0 | 56.7    | 1025.8  | 9.2  | 25.0 | NA  | NA   | NA   |
| ON.Dickie           | Both cohorts | Ontario, CA       | 45.149 | -79.089 | 354.5 | 596305.0 | 93.6    | 1878.4  | 5.0  | 12.0 | NA  | NA   | NA   |
| ON.Harp             | Both cohorts | Ontario, CA       | 45.379 | -79.135 | 327.0 | 617127.0 | 71.4    | 1264.5  | 13.3 | 37.5 | NA  | NA   | NA   |
| ON.Heney            | Both cohorts | Ontario, CA       | 45.128 | -79.104 | 345.5 | 595763.0 | 21.4    | 963.5   | 3.3  | 5.8  | NA  | NA   | NA   |
| ON.Opeongo          | 1985 cohort  | Ontario, CA       | 45.693 | -78.381 | 404.0 | 560484.0 | 5808.0  | 15052.8 | 14.8 | 51.0 | 3.2 | 1.6  | 5.8  |
| ON.Plastic          | Both cohorts | Ontario, CA       | 45.180 | -78.822 | 253.9 | 584036.0 | 32.1    | 954.0   | 7.9  | 16.3 | NA  | NA   | NA   |
| ON.RedChalkMain     | Both cohorts | Ontario, CA       | 45.190 | -78.948 | 343.0 | 591663.0 | 44.1    | 1583.8  | 16.7 | 38.0 | NA  | NA   | NA   |
| PA.Beltzville       | 1985 cohort  | Pennsylvania, USA | 40.852 | -75.637 | 191.0 | 106257.0 | 382.0   | 6880.7  | 17.5 | 39.5 | 3.8 | NA   | NA   |
| PA.BlueMarsh        | 1985 cohort  | Pennsylvania, USA | 40.382 | -76.034 | 88.0  | 81702.2  | 465.0   | 8167.4  | 7.5  | 16.5 | 1.5 | NA   | NA   |
| PA.Giles            | 1985 cohort  | Pennsylvania, USA | 41.376 | -75.093 | 428.0 | 93484.0  | 48.1    | 1021.7  | 10.6 | 24.0 | 7.0 | 1.3  | 3.5  |
| PA.Lacawac          | 1985 cohort  | Pennsylvania, USA | 41.382 | -75.292 | 439.0 | 109714.0 | 21.4    | 606.1   | 5.0  | 13.0 | 2.9 | 3.2  | 9.0  |
| PA.Wallenpaupack    | Both cohorts | Pennsylvania, USA | 41.414 | -75.240 | 361.0 | 105803.0 | 2307.0  | 15246.3 | NA   | 16.0 | 2.0 | 16.0 | 18.0 |
| RI.DeepCharlestown  | 1985 cohort  | Rhode Island, USA | 41.391 | -71.662 | 13.9  | 4031.1   | 6.7     | 470.9   | NA   | 10.0 | 4.8 | 4.0  | 17.0 |
| RI.Georgiaville     | 1985 cohort  | Rhode Island, USA | 41.893 | -71.511 | 46.2  | 14577.4  | 39.7    | 1395.2  | NA   | 7.0  | 3.4 | 3.5  | 14.0 |
| RI.HundredAcre      | 1985 cohort  | Rhode Island, USA | 41.500 | -71.543 | 29.1  | 10198.0  | 34.5    | 881.4   | NA   | 11.6 | 1.9 | 10.8 | 20.0 |
| RI.SchoolhouseLower | 1985 cohort  | Rhode Island, USA | 41.395 | -71.665 | 15.9  | 4031.1   | 19.4    | 1390.3  | NA   | 8.5  | 4.9 | 1.6  | 13.0 |
| RI.Watchaug         | 1985 cohort  | Rhode Island, USA | 41.379 | -71.690 | 11.1  | 3535.5   | 232.6   | 2229.2  | NA   | 13.1 | 2.7 | 4.2  | 14.0 |
| RI.White            | 1985 cohort  | Rhode Island, USA | 41.415 | -71.546 | 29.5  | 4272.0   | 1.6     | 637.5   | NA   | 13.6 | 8.3 | 0.9  | 8.0  |
| RI.Yawgoo           | 1985 cohort  | Rhode Island, USA | 41.511 | -71.572 | 36.1  | 12589.7  | 58.7    | 1090.7  | NA   | 10.0 | 2.7 | 8.7  | 40.0 |
