# Supplementary material
Source: MDPI journal article supplement (https://www.mdpi.com/2073-4441/9/6/442)
Supplement: s1 [file s1]

# Transparency, geomorphology, and mixing regime explain variability in trends in lake temperature and stratification across northeastern North America (1975 - 2012)

David C. Richardson<sup>1\*</sup>, Stephanie J. Melles<sup>2</sup>, Rachel M. Pilla<sup>3a</sup>, Amy L. Hetherington<sup>4</sup>, Lesley B. Knoll<sup>5</sup>, Craig E. Williamson<sup>3b</sup>, Benjamin M. Kraemer<sup>6,7</sup>, James R. Jackson<sup>8a</sup>, Elizabeth C. Long<sup>9</sup>, Karen Moore<sup>10</sup>, Lars G. Rudstam<sup>8b</sup>, James A. Rusak<sup>11</sup>, Jasmine E. Saros<sup>12</sup>, Sapna Sharma<sup>13</sup>, Kristin E. Strock<sup>14</sup>, Kathleen C. Weathers<sup>15</sup>, Courtney R. Wigdahl-Perry<sup>16</sup>

<sup>1</sup> SUNY New Paltz; 1 Hawk Drive; New Paltz, New York 12561, US; richardsond@newpaltz.edu

<sup>2</sup> Ryerson University; 350 Victoria Street; Toronto, Ontario M5B 2K3, CA; stephanie.melles@ryerson.ca

<sup>3</sup> Miami University, Department of Biology; 700 E High Street; Oxford, Ohio 45056, US; <sup>a</sup>pillarm@miamioh.edu, <sup>b</sup>willia85@miamioh.edu

<sup>4</sup> Virginia Polytechnic Institute and State University; 2011 Derring Hall; 926 West Campus Drive; Blacksburg, Virginia 24061, US; amyheth@vt.edu

<sup>5</sup> University of Minnesota Twin Cities; Itasca Biological Station and Laboratories; 28131 University Circle; Lake Itasca, Minnesota 56470, US; lbknoll@umn.edu

<sup>6</sup> University of Wisconsin-Madison, 680 North Park Street, Madison, Wisconsin 53706, US

<sup>7</sup> Leibniz Institute of Freshwater Ecology and Inland Fisheries, Müggelseedamm 310, Berlin, Germany 12587, DE; ben.m.kraemer@gmail.com

<sup>8</sup> Cornell University Biological Field Station, Department of Natural Resources, 900 Shackelton Point Road, Bridgeport, New York 13030, US; <sup>a</sup>jrj26@cornell.edu, <sup>b</sup>lgr1@cornell.edu

<sup>9</sup> Mohonk Preserve, Daniel Smiley Research Center, P.O. Box 715, New Paltz, New York 12561, US; elong@mohonkpreserve.org

<sup>10</sup> New York City Department of Environmental Protection, 71 Smith Avenue Kingston, New York 12401, US; karenmoore@dep.nyc.gov

<sup>11</sup> Dorset Environmental Science Centre, Ontario Ministry of the Environment and Climate Change, P.O. Box 39, Dorset, Ontario, P0A1E0, CA; Jim.Rusak@ontario.ca

<sup>12</sup> University of Maine, 137 Sawyer Research Center, Orono, ME 04401, US; jasmine.saros@maine.edu

<sup>13</sup> Department of Biology, York University, Toronto, Ontario M3P1J3, CA; sharma11@yorku.ca

<sup>14</sup> Dickinson College, 28 North College Street, Carlisle, Pennsylvania 17013, US; strockk@dickinson.edu

<sup>15</sup> Cary Institute of Ecosystem Studies, Box AB, Millbrook, NY 12545, US; weathersk@caryinstitute.org

<sup>16</sup> State University of New York at Fredonia, 280 Central Avenue, Fredonia, NY 14063, US; courtney.wigdahl@fredonia.edu

\* Correspondence: richardsond@newpaltz.edu; Tel.: +01-845-257-3805

## Supporting Information

Table S4: Data provider information for all 231 lakes

**Table S4.** List of all lakes, cohorts, locations, and data providers for this study.

| Lake Name (ID)                      | Cohort       | Location<br>(State or Province,<br>Country) | Data Provider(s)                                    |
|-------------------------------------|--------------|---------------------------------------------|-----------------------------------------------------|
| MA.Quabbin                          | 1985 cohort  | Massachusetts, USA                          | Paul Reyes (Mass. Dept. of Conservation)            |
| ME.AdamsPond.3396                   | 1985 cohort  | Maine, USA                                  | Linda Bacon (Maine DEP)                             |
| ME.AdamsPond.5366                   | 1985 cohort  | Maine, USA                                  | Linda Bacon (Maine DEP)                             |
| ME.AndroscogginLake.3836            | 1985 cohort  | Maine, USA                                  | Linda Bacon (Maine DEP)                             |
| ME.AnnabessacookLake.9961           | Both cohorts | Maine, USA                                  | Linda Bacon (Maine DEP)                             |
| ME.AuburnLake.3748                  | Both cohorts | Maine, USA                                  | Linda Bacon (Maine DEP)                             |
| ME.Bear&LittleBearPds.3624          | Both cohorts | Maine, USA                                  | Linda Bacon (Maine DEP)                             |
| ME.BearPond.3420                    | Both cohorts | Maine, USA                                  | Linda Bacon (Maine DEP)                             |
| ME.BeaverPond.5582                  | 1985 cohort  | Maine, USA                                  | Linda Bacon (Maine DEP)                             |
| ME.BeechHillPond.4352               | 1985 cohort  | Maine, USA                                  | Linda Bacon (Maine DEP)                             |
| ME.BerryPond.3828                   | Both cohorts | Maine, USA                                  | Linda Bacon (Maine DEP)                             |
| ME.BiscayPond.5710                  | 1985 cohort  | Maine, USA                                  | Linda Bacon (Maine DEP)                             |
| ME.BranchLake.4328                  | 1985 cohort  | Maine, USA                                  | Linda Bacon (Maine DEP)                             |
| ME.BryantPond(LakeChristopher).3464 | 1985 cohort  | Maine, USA                                  | Linda Bacon (Maine DEP)                             |
| ME.Bubble                           | 1985 cohort  | Maine, USA                                  | Kristin Strock, Jasmine Saros (University of Maine) |
| ME.CarltonPond.5310                 | Both cohorts | Maine, USA                                  | Linda Bacon (Maine DEP)                             |
| ME.CathanceLake.9661                | Both cohorts | Maine, USA                                  | Linda Bacon (Maine DEP)                             |
| ME.ChickawaukiePond.4822            | Both cohorts | Maine, USA                                  | Linda Bacon (Maine DEP)                             |
| ME.ChinaLake.5448                   | 1985 cohort  | Maine, USA                                  | Linda Bacon (Maine DEP)                             |
| ME.Clary(Pleasant)Lake.5382         | Both cohorts | Maine, USA                                  | Linda Bacon (Maine DEP)                             |
| ME.CobbosseeconteeLake.5236         | Both cohorts | Maine, USA                                  | Linda Bacon (Maine DEP)                             |
| ME.CochnewagonPond.3814             | Both cohorts | Maine, USA                                  | Linda Bacon (Maine DEP)                             |
| ME.ColdRainPond.3376                | 1985 cohort  | Maine, USA                                  | Linda Bacon (Maine DEP)                             |
| ME.ColdStreamPond.2146              | 1985 cohort  | Maine, USA                                  | Linda Bacon (Maine DEP)                             |
| ME.Crescent(Rattlesnake)Lake.3696   | 1985 cohort  | Maine, USA                                  | Linda Bacon (Maine DEP)                             |
| ME.CrossLake.1674                   | 1985 cohort  | Maine, USA                                  | Linda Bacon (Maine DEP)                             |
| ME.Crystal(Anonymous)Lake.3452      | Both cohorts | Maine, USA                                  | Linda Bacon (Maine DEP)                             |
| ME.Crystal(Beals)Pond.3626          | 1985 cohort  | Maine, USA                                  | Linda Bacon (Maine DEP)                             |
| ME.DamariscottaLake.5400            | Both cohorts | Maine, USA                                  | Linda Bacon (Maine DEP)                             |

|                                           |              |            |                                                     |
|-------------------------------------------|--------------|------------|-----------------------------------------------------|
| ME.DexterPond.3830                        | Both cohorts | Maine, USA | Linda Bacon (Maine DEP)                             |
| ME.DuckpuddlePond.5702                    | Both cohorts | Maine, USA | Linda Bacon (Maine DEP)                             |
| ME.Eagle                                  | 1985 cohort  | Maine, USA | Kristin Strock, Jasmine Saros (University of Maine) |
| ME.EastPond.5349                          | Both cohorts | Maine, USA | Linda Bacon (Maine DEP)                             |
| ME.EchoLake(CrotchedPond).5814            | 1985 cohort  | Maine, USA | Linda Bacon (Maine DEP)                             |
| ME.EchoLake.4624                          | 1985 cohort  | Maine, USA | Linda Bacon (Maine DEP)                             |
| ME.EmbdenPond.78                          | Both cohorts | Maine, USA | Linda Bacon (Maine DEP)                             |
| ME.FlyingPond.5182                        | 1985 cohort  | Maine, USA | Linda Bacon (Maine DEP)                             |
| ME.GreatPond.5274                         | Both cohorts | Maine, USA | Linda Bacon (Maine DEP)                             |
| ME.GreenLake.4294                         | Both cohorts | Maine, USA | Linda Bacon (Maine DEP)                             |
| ME.HaleyPond.3534                         | Both cohorts | Maine, USA | Linda Bacon (Maine DEP)                             |
| ME.HancockPond.3132                       | Both cohorts | Maine, USA | Linda Bacon (Maine DEP)                             |
| ME.HealdPond.3222                         | 1985 cohort  | Maine, USA | Linda Bacon (Maine DEP)                             |
| ME.HighlandLake.3454                      | Both cohorts | Maine, USA | Linda Bacon (Maine DEP)                             |
| ME.HighlandLake.3734                      | 1985 cohort  | Maine, USA | Linda Bacon (Maine DEP)                             |
| ME.HornePond.3408                         | 1985 cohort  | Maine, USA | Linda Bacon (Maine DEP)                             |
| ME.Ingalls(Foster's)Pond.3188             | 1985 cohort  | Maine, USA | Linda Bacon (Maine DEP)                             |
| ME.IslandPond.3448                        | 1985 cohort  | Maine, USA | Linda Bacon (Maine DEP)                             |
| ME.Jordan                                 | 1985 cohort  | Maine, USA | Kristin Strock, Jasmine Saros (University of Maine) |
| ME.KennebagoLake.2374                     | 1985 cohort  | Maine, USA | Linda Bacon (Maine DEP)                             |
| ME.KeokaLake.3416                         | 1985 cohort  | Maine, USA | Linda Bacon (Maine DEP)                             |
| ME.KeysPond.3232                          | Both cohorts | Maine, USA | Linda Bacon (Maine DEP)                             |
| ME.KezarLake.97                           | Both cohorts | Maine, USA | Linda Bacon (Maine DEP)                             |
| ME.LakeAnasagunticook.3604                | 1985 cohort  | Maine, USA | Linda Bacon (Maine DEP)                             |
| ME.LittleCobbosseecontee.8065             | Both cohorts | Maine, USA | Linda Bacon (Maine DEP)                             |
| ME.LittleOssipeeLake.5024                 | 1975 cohort  | Maine, USA | Linda Bacon (Maine DEP)                             |
| ME.LittlePennesseewassee.367              | Both cohorts | Maine, USA | Linda Bacon (Maine DEP)                             |
| ME.LittleSebagoLake.3714                  | Both cohorts | Maine, USA | Linda Bacon (Maine DEP)                             |
| ME.LittleWilson(French,Ramsdell)Pond.3784 | 1985 cohort  | Maine, USA | Linda Bacon (Maine DEP)                             |
| ME.Long(McWain)Pond.3418                  | 1985 cohort  | Maine, USA | Linda Bacon (Maine DEP)                             |
| ME.LongLake.5780                          | Both cohorts | Maine, USA | Linda Bacon (Maine DEP)                             |
| ME.LongPond.3084                          | 1985 cohort  | Maine, USA | Linda Bacon (Maine DEP)                             |
| ME.LongPond.4622                          | 1985 cohort  | Maine, USA | Linda Bacon (Maine DEP)                             |
| ME.LongPond.5272                          | Both cohorts | Maine, USA | Linda Bacon (Maine DEP)                             |

|                                          |              |            |                         |
|------------------------------------------|--------------|------------|-------------------------|
| ME.LovejoyPond.5176                      | 1985 cohort  | Maine, USA | Linda Bacon (Maine DEP) |
| ME.LowerNarrowsPond.103                  | Both cohorts | Maine, USA | Linda Bacon (Maine DEP) |
| ME.MadawaskaLake.1802                    | Both cohorts | Maine, USA | Linda Bacon (Maine DEP) |
| ME.MaranacookLake.5312                   | Both cohorts | Maine, USA | Linda Bacon (Maine DEP) |
| ME.McGrathPond.5348                      | 1975 cohort  | Maine, USA | Linda Bacon (Maine DEP) |
| ME.Meduxnekeag(Drews)Lake.1736           | 1985 cohort  | Maine, USA | Linda Bacon (Maine DEP) |
| ME.MegunticookLake.4852                  | 1985 cohort  | Maine, USA | Linda Bacon (Maine DEP) |
| ME.MessalonskeeLake.5280                 | Both cohorts | Maine, USA | Linda Bacon (Maine DEP) |
| ME.MiddleRangePond.3762                  | 1985 cohort  | Maine, USA | Linda Bacon (Maine DEP) |
| ME.Mooselookmeguntic(Cupsuptic)Lake.3302 | 1985 cohort  | Maine, USA | Linda Bacon (Maine DEP) |
| ME.MoosePond.2590                        | Both cohorts | Maine, USA | Linda Bacon (Maine DEP) |
| ME.MoosePond.3134                        | Both cohorts | Maine, USA | Linda Bacon (Maine DEP) |
| ME.MoosePond.3424                        | 1985 cohort  | Maine, USA | Linda Bacon (Maine DEP) |
| ME.MountainyPond.4292                    | 1985 cohort  | Maine, USA | Linda Bacon (Maine DEP) |
| ME.MousamLake.3838                       | Both cohorts | Maine, USA | Linda Bacon (Maine DEP) |
| ME.NequassetLake.5222                    | 1985 cohort  | Maine, USA | Linda Bacon (Maine DEP) |
| ME.NorthLake(LittlePond).5344            | Both cohorts | Maine, USA | Linda Bacon (Maine DEP) |
| ME.NorthPond.3500                        | Both cohorts | Maine, USA | Linda Bacon (Maine DEP) |
| ME.OtterPond.3458                        | 1985 cohort  | Maine, USA | Linda Bacon (Maine DEP) |
| ME.PantherPond.3694                      | 1985 cohort  | Maine, USA | Linda Bacon (Maine DEP) |
| ME.PapoosePond.3414                      | 1985 cohort  | Maine, USA | Linda Bacon (Maine DEP) |
| ME.ParkerPond.5186                       | 1985 cohort  | Maine, USA | Linda Bacon (Maine DEP) |
| ME.PeabodyPond.3374                      | Both cohorts | Maine, USA | Linda Bacon (Maine DEP) |
| ME.PemaquidPond.5704                     | Both cohorts | Maine, USA | Linda Bacon (Maine DEP) |
| ME.PennesseewasseeLake.3434              | Both cohorts | Maine, USA | Linda Bacon (Maine DEP) |
| ME.PleasantLake.3446                     | Both cohorts | Maine, USA | Linda Bacon (Maine DEP) |
| ME.PleasantPond.3822                     | Both cohorts | Maine, USA | Linda Bacon (Maine DEP) |
| ME.QuimbyPond.3526                       | 1985 cohort  | Maine, USA | Linda Bacon (Maine DEP) |
| ME.Rangeley(Oquossoc)Lake.3300           | 1985 cohort  | Maine, USA | Linda Bacon (Maine DEP) |
| ME.RaymondPond.3690                      | 1985 cohort  | Maine, USA | Linda Bacon (Maine DEP) |
| ME.SabattusPond.3796                     | Both cohorts | Maine, USA | Linda Bacon (Maine DEP) |
| ME.SabbathdayLake.3700                   | 1985 cohort  | Maine, USA | Linda Bacon (Maine DEP) |
| ME.SaddlebackLake.3536                   | 1985 cohort  | Maine, USA | Linda Bacon (Maine DEP) |
| ME.SalmonPond(EllisPond).5352            | Both cohorts | Maine, USA | Linda Bacon (Maine DEP) |

|                                  |              |                    |                                                               |
|----------------------------------|--------------|--------------------|---------------------------------------------------------------|
| ME.Sand(Walden)Pond.3130         | 1985 cohort  | Maine, USA         | Linda Bacon (Maine DEP)                                       |
| ME.SandPond(TacomaLakes).5238    | Both cohorts | Maine, USA         | Linda Bacon (Maine DEP)                                       |
| ME.SandPond.3432                 | Both cohorts | Maine, USA         | Linda Bacon (Maine DEP)                                       |
| ME.SealCovePond.4630             | 1985 cohort  | Maine, USA         | Linda Bacon (Maine DEP)                                       |
| ME.SebasticookLake.2264          | Both cohorts | Maine, USA         | Linda Bacon (Maine DEP)                                       |
| ME.SewallPond.9943               | 1985 cohort  | Maine, USA         | Linda Bacon (Maine DEP)                                       |
| ME.SquarePond.3916               | Both cohorts | Maine, USA         | Linda Bacon (Maine DEP)                                       |
| ME.StearnsPond.3234              | 1985 cohort  | Maine, USA         | Linda Bacon (Maine DEP)                                       |
| ME.StGeorgeLake.9971             | Both cohorts | Maine, USA         | Linda Bacon (Maine DEP)                                       |
| ME.SwanLake(GoosePond).5492      | Both cohorts | Maine, USA         | Linda Bacon (Maine DEP)                                       |
| ME.TaylorPond.3750               | Both cohorts | Maine, USA         | Linda Bacon (Maine DEP)                                       |
| ME.ThomasPond.3392               | 1985 cohort  | Maine, USA         | Linda Bacon (Maine DEP)                                       |
| ME.ThompsonLake(TheHeath).3444   | Both cohorts | Maine, USA         | Linda Bacon (Maine DEP)                                       |
| ME.ThreemilePond.5416            | Both cohorts | Maine, USA         | Linda Bacon (Maine DEP)                                       |
| ME.TogusPond.9931                | Both cohorts | Maine, USA         | Linda Bacon (Maine DEP)                                       |
| ME.ToothakerPond.2336            | 1975 cohort  | Maine, USA         | Linda Bacon (Maine DEP)                                       |
| ME.Torsey(Greeley)Lake.5307      | Both cohorts | Maine, USA         | Linda Bacon (Maine DEP)                                       |
| ME.TrickyPond.3382               | Both cohorts | Maine, USA         | Linda Bacon (Maine DEP)                                       |
| ME.TrippPond.3758                | Both cohorts | Maine, USA         | Linda Bacon (Maine DEP)                                       |
| ME.UnityPond(WinnecookLake).5172 | Both cohorts | Maine, USA         | Linda Bacon (Maine DEP)                                       |
| ME.UpperPleasant(Mud)Pond.5254   | Both cohorts | Maine, USA         | Linda Bacon (Maine DEP)                                       |
| ME.UpperRangePond.3688           | 1975 cohort  | Maine, USA         | Linda Bacon (Maine DEP)                                       |
| ME.WalkerPond.4640               | 1985 cohort  | Maine, USA         | Linda Bacon (Maine DEP)                                       |
| ME.WashingtonPond.4894           | 1985 cohort  | Maine, USA         | Linda Bacon (Maine DEP)                                       |
| ME.Webb(Weld)Lake.3672           | Both cohorts | Maine, USA         | Linda Bacon (Maine DEP)                                       |
| ME.WebberPond.5408               | Both cohorts | Maine, USA         | Linda Bacon (Maine DEP)                                       |
| ME.WesserunettLake.70            | 1985 cohort  | Maine, USA         | Linda Bacon (Maine DEP)                                       |
| ME.WilsonLake.3920               | 1985 cohort  | Maine, USA         | Linda Bacon (Maine DEP)                                       |
| ME.WilsonPond.3832               | Both cohorts | Maine, USA         | Linda Bacon (Maine DEP)                                       |
| ME.WoodsPond.3456                | Both cohorts | Maine, USA         | Linda Bacon (Maine DEP)                                       |
| ME.WorthleyPond.3594             | 1975 cohort  | Maine, USA         | Linda Bacon (Maine DEP)                                       |
| NH.ARMINGTONLAKE.ARMPIED         | 1985 cohort  | New Hampshire, USA | Sara Steiner, Melanie Titus, Scott Ashley (New Hampshire DES) |
| NH.ASHUELOTPOND.ASHWASD          | 1985 cohort  | New Hampshire, USA | Sara Steiner, Melanie Titus, Scott Ashley (New Hampshire DES) |
| NH.AYERSPOND.AYEBARD             | 1985 cohort  | New Hampshire, USA | Sara Steiner, Melanie Titus, Scott Ashley (New Hampshire DES) |

|                              |             |                    |                                                                     |
|------------------------------|-------------|--------------------|---------------------------------------------------------------------|
| NH.BAXTERLAKE.BAXFARD        | 1985 cohort | New Hampshire, USA | Sara Steiner, Melanie Titus, Scott Ashley (New Hampshire DES)       |
| NH.BLAISDELLLAKE.BLASUTD     | 1985 cohort | New Hampshire, USA | Sara Steiner, Melanie Titus, Scott Ashley (New Hampshire DES)       |
| NH.BROADBAY.BROOSSD          | 1985 cohort | New Hampshire, USA | Sara Steiner, Melanie Titus, Scott Ashley (New Hampshire DES)       |
| NH.CANAANSTREETLAKE.CANCAND  | 1985 cohort | New Hampshire, USA | Sara Steiner, Melanie Titus, Scott Ashley (New Hampshire DES)       |
| NH.CENTERPOND.CENSTDD        | 1985 cohort | New Hampshire, USA | Sara Steiner, Melanie Titus, Scott Ashley (New Hampshire DES)       |
| NH.CHALKPOND.CHANBYD         | 1985 cohort | New Hampshire, USA | Sara Steiner, Melanie Titus, Scott Ashley (New Hampshire DES)       |
| NH.CHASEPOND.CHAWLMD         | 1985 cohort | New Hampshire, USA | Sara Steiner, Melanie Titus, Scott Ashley (New Hampshire DES)       |
| NH.CLOUGHPOND.CLOLOUD        | 1985 cohort | New Hampshire, USA | Sara Steiner, Melanie Titus, Scott Ashley (New Hampshire DES)       |
| NH.COBBETTSPOND.COBWINS      | 1985 cohort | New Hampshire, USA | Sara Steiner, Melanie Titus, Scott Ashley (New Hampshire DES)       |
| NH.CRYSTALLAKE.CRYGLMD       | 1985 cohort | New Hampshire, USA | Sara Steiner, Melanie Titus, Scott Ashley (New Hampshire DES)       |
| NH.DEERINGRESERVOIR.DEEDRGD  | 1985 cohort | New Hampshire, USA | Sara Steiner, Melanie Titus, Scott Ashley (New Hampshire DES)       |
| NH.DUTCHMANPOND.DUTSPRD      | 1985 cohort | New Hampshire, USA | Sara Steiner, Melanie Titus, Scott Ashley (New Hampshire DES)       |
| NH.EASTMANPOND.EASGTMD       | 1985 cohort | New Hampshire, USA | Sara Steiner, Melanie Titus, Scott Ashley (New Hampshire DES)       |
| NH.FORESTLAKE.FORDALD        | 1985 cohort | New Hampshire, USA | Sara Steiner, Melanie Titus, Scott Ashley (New Hampshire DES)       |
| NH.FORESTLAKE.FORWCHD        | 1985 cohort | New Hampshire, USA | Sara Steiner, Melanie Titus, Scott Ashley (New Hampshire DES)       |
| NH.GOVERNORSLAKE.GOVRAYD     | 1985 cohort | New Hampshire, USA | Sara Steiner, Melanie Titus, Scott Ashley (New Hampshire DES)       |
| NH.GRANITELAKE.GRASTDD       | 1985 cohort | New Hampshire, USA | Sara Steiner, Melanie Titus, Scott Ashley (New Hampshire DES)       |
| NH.HALFMOONLAKE.HALALTD      | 1985 cohort | New Hampshire, USA | Sara Steiner, Melanie Titus, Scott Ashley (New Hampshire DES)       |
| NH.HARRISVILLEPOND.HARHARD   | 1985 cohort | New Hampshire, USA | Sara Steiner, Melanie Titus, Scott Ashley (New Hampshire DES)       |
| NH.HIGHLANDLAKE.HIGANDD      | 1985 cohort | New Hampshire, USA | Sara Steiner, Melanie Titus, Scott Ashley (New Hampshire DES)       |
| NH.HIGHLANDLAKE.HIGSTDND     | 1985 cohort | New Hampshire, USA | Sara Steiner, Melanie Titus, Scott Ashley (New Hampshire DES)       |
| NH.HILLSPOND.HILALTD         | 1985 cohort | New Hampshire, USA | Sara Steiner, Melanie Titus, Scott Ashley (New Hampshire DES)       |
| NH.HubbardBrook.Mirror       | 1985 cohort | New Hampshire, USA | Gene E. Likens (Cary Institute of Ecosystem Studies; Hubbard Brook) |
| NH.ISLANDPOND.ISLDERD        | 1985 cohort | New Hampshire, USA | Sara Steiner, Melanie Titus, Scott Ashley (New Hampshire DES)       |
| NH.ISLANDPOND.ISLSTDVLAPD    | 1985 cohort | New Hampshire, USA | Sara Steiner, Melanie Titus, Scott Ashley (New Hampshire DES)       |
| NH.KEZARLAKE.KEZSUTD         | 1985 cohort | New Hampshire, USA | Sara Steiner, Melanie Titus, Scott Ashley (New Hampshire DES)       |
| NH.KOLELEMOOKLAKE.KOLSPRD    | 1985 cohort | New Hampshire, USA | Sara Steiner, Melanie Titus, Scott Ashley (New Hampshire DES)       |
| NH.LAKEWINNISQUAM.WINPLACD   | 1985 cohort | New Hampshire, USA | Sara Steiner, Melanie Titus, Scott Ashley (New Hampshire DES)       |
| NH.LAKEWINONA.WINNWH         | 1985 cohort | New Hampshire, USA | Sara Steiner, Melanie Titus, Scott Ashley (New Hampshire DES)       |
| NH.LAURELLAKE.LAUFITD        | 1985 cohort | New Hampshire, USA | Sara Steiner, Melanie Titus, Scott Ashley (New Hampshire DES)       |
| NH.LEAVITTBAY.LEAOSSD        | 1985 cohort | New Hampshire, USA | Sara Steiner, Melanie Titus, Scott Ashley (New Hampshire DES)       |
| NH.LONGPOND.LONLEMD          | 1985 cohort | New Hampshire, USA | Sara Steiner, Melanie Titus, Scott Ashley (New Hampshire DES)       |
| NH.LOONLAKE.LOOPLYD          | 1985 cohort | New Hampshire, USA | Sara Steiner, Melanie Titus, Scott Ashley (New Hampshire DES)       |
| NH.LOWERSUNCOOKPOND.SUNLBRND | 1985 cohort | New Hampshire, USA | Sara Steiner, Melanie Titus, Scott Ashley (New Hampshire DES)       |

|                              |              |                    |                                                               |
|------------------------------|--------------|--------------------|---------------------------------------------------------------|
| NH.LSPA.Sunapee              | 1985 cohort  | New Hampshire, USA | Lake Sunapee Protective Association, New Hampshire            |
| NH.MASSASECUMLAKE.MASBRAD    | 1985 cohort  | New Hampshire, USA | Sara Steiner, Melanie Titus, Scott Ashley (New Hampshire DES) |
| NH.MOUNTAINVIEWLAKE.MOUSUND  | 1985 cohort  | New Hampshire, USA | Sara Steiner, Melanie Titus, Scott Ashley (New Hampshire DES) |
| NH.NUBANUSITLAKE.NUBNELD     | 1985 cohort  | New Hampshire, USA | Sara Steiner, Melanie Titus, Scott Ashley (New Hampshire DES) |
| NH.OTTERPOND.OTTSUND         | 1985 cohort  | New Hampshire, USA | Sara Steiner, Melanie Titus, Scott Ashley (New Hampshire DES) |
| NH.PARTRIDGELAKE.PARLTLD     | 1985 cohort  | New Hampshire, USA | Sara Steiner, Melanie Titus, Scott Ashley (New Hampshire DES) |
| NH.PAWTUCKAWAYLAKE.PAWNOTND  | 1985 cohort  | New Hampshire, USA | Sara Steiner, Melanie Titus, Scott Ashley (New Hampshire DES) |
| NH.PEARLYLAKE.PEARIND        | 1985 cohort  | New Hampshire, USA | Sara Steiner, Melanie Titus, Scott Ashley (New Hampshire DES) |
| NH.PERKINSPOND.PERSUND       | 1985 cohort  | New Hampshire, USA | Sara Steiner, Melanie Titus, Scott Ashley (New Hampshire DES) |
| NH.PINERIVERPOND.PINWAKD     | 1985 cohort  | New Hampshire, USA | Sara Steiner, Melanie Titus, Scott Ashley (New Hampshire DES) |
| NH.PLEASANTLAKE.PLEDEED      | 1985 cohort  | New Hampshire, USA | Sara Steiner, Melanie Titus, Scott Ashley (New Hampshire DES) |
| NH.PROVINCELAKE.PROEFFD      | 1985 cohort  | New Hampshire, USA | Sara Steiner, Melanie Titus, Scott Ashley (New Hampshire DES) |
| NH.RANDPOND.RANGOSD          | 1985 cohort  | New Hampshire, USA | Sara Steiner, Melanie Titus, Scott Ashley (New Hampshire DES) |
| NH.ROCKPOND.ROCWIND          | 1985 cohort  | New Hampshire, USA | Sara Steiner, Melanie Titus, Scott Ashley (New Hampshire DES) |
| NH.ROCKYBOUNDPOND.ROCCROD    | 1985 cohort  | New Hampshire, USA | Sara Steiner, Melanie Titus, Scott Ashley (New Hampshire DES) |
| NH.RUSTPOND.RUSWOLD          | 1985 cohort  | New Hampshire, USA | Sara Steiner, Melanie Titus, Scott Ashley (New Hampshire DES) |
| NH.SANDPOND.SANMLWD          | 1985 cohort  | New Hampshire, USA | Sara Steiner, Melanie Titus, Scott Ashley (New Hampshire DES) |
| NH.SEBBINSPOND.SEBBEDD       | 1985 cohort  | New Hampshire, USA | Sara Steiner, Melanie Titus, Scott Ashley (New Hampshire DES) |
| NH.SPOFFORDLAKE.SPOCHED      | 1985 cohort  | New Hampshire, USA | Sara Steiner, Melanie Titus, Scott Ashley (New Hampshire DES) |
| NH.STINSONLAKE.STIRUMD       | 1985 cohort  | New Hampshire, USA | Sara Steiner, Melanie Titus, Scott Ashley (New Hampshire DES) |
| NH.STOCKERPOND.STOGTMD       | 1985 cohort  | New Hampshire, USA | Sara Steiner, Melanie Titus, Scott Ashley (New Hampshire DES) |
| NH.SUNSETLAKE.SUNALTD        | 1985 cohort  | New Hampshire, USA | Sara Steiner, Melanie Titus, Scott Ashley (New Hampshire DES) |
| NH.SWANZEYLAKE.SWASWAD       | 1985 cohort  | New Hampshire, USA | Sara Steiner, Melanie Titus, Scott Ashley (New Hampshire DES) |
| NH.THORNDIKEPOND.THOJAFD     | 1985 cohort  | New Hampshire, USA | Sara Steiner, Melanie Titus, Scott Ashley (New Hampshire DES) |
| NH.TODDLAKE.TODNBYD          | 1985 cohort  | New Hampshire, USA | Sara Steiner, Melanie Titus, Scott Ashley (New Hampshire DES) |
| NH.TOMPOND.TOMWRND           | 1985 cohort  | New Hampshire, USA | Sara Steiner, Melanie Titus, Scott Ashley (New Hampshire DES) |
| NH.TUCKERPOND.TUCSBYD        | 1985 cohort  | New Hampshire, USA | Sara Steiner, Melanie Titus, Scott Ashley (New Hampshire DES) |
| NH.UPPERSUNCOOKPOND.SUNUBRND | 1985 cohort  | New Hampshire, USA | Sara Steiner, Melanie Titus, Scott Ashley (New Hampshire DES) |
| NH.WEBSTERLAKE.WEBFRKD       | 1985 cohort  | New Hampshire, USA | Sara Steiner, Melanie Titus, Scott Ashley (New Hampshire DES) |
| NH.WHITEOAKPOND.WHIHOLD      | 1985 cohort  | New Hampshire, USA | Sara Steiner, Melanie Titus, Scott Ashley (New Hampshire DES) |
| NY.ADK.EastLake              | Both cohorts | New York, USA      | Daniel Josephson, Clifford Kraft (Cornell University)         |
| NY.ADK.FirstBisbyLake        | Both cohorts | New York, USA      | Daniel Josephson, Clifford Kraft (Cornell University)         |
| NY.ADK.HonnedagaLake         | Both cohorts | New York, USA      | Daniel Josephson, Clifford Kraft (Cornell University)         |
| NY.ADK.LittleMooseLake       | Both cohorts | New York, USA      | Daniel Josephson, Clifford Kraft (Cornell University)         |

|                        |              |                   |                                                                     |
|------------------------|--------------|-------------------|---------------------------------------------------------------------|
| NY.ADK.LowerSylvanPond | 1985 cohort  | New York, USA     | Daniel Josephson, Clifford Kraft (Cornell University)               |
| NY.ADK.PantherLake     | Both cohorts | New York, USA     | Daniel Josephson, Clifford Kraft (Cornell University)               |
| NY.ADK.RockLake        | 1985 cohort  | New York, USA     | Daniel Josephson, Clifford Kraft (Cornell University)               |
| NY.CanadaragoLake      | 1985 cohort  | New York, USA     | Randy Jackson (Cornell Biological Field Station)                    |
| NY.Honeoye             | 1985 cohort  | New York, USA     | Terry Gronwall, Bruce Gilman (Honeoye Lake Watershed Task Force)    |
| NY.LakeGeorge          | Both cohorts | New York, USA     | Lawrence Eichler, Charles Boylen, Sandra Nierzwicki-Bauer (RPI)     |
| NY.Mohonk              | 1985 cohort  | New York, USA     | David Richardson, Elizabeth Long (Mohonk Preserve)                  |
| NY.NorthChautauqua     | 1985 cohort  | New York, USA     | Michael Clancy (NY DEC)                                             |
| NY.Oneida              | Both cohorts | New York, USA     | Amy Hetherington (Cornell University)                               |
| NY.SouthChautauqua     | 1985 cohort  | New York, USA     | Michael Clancy (NY DEC)                                             |
| NY.UpperSaranac        | 1985 cohort  | New York, USA     | Corey Laxson (Paul Smith's College)                                 |
| ON.BlueChalk           | Both cohorts | Ontario, CA       | James Rusak (Dorset Environmental Science Centre)                   |
| ON.Chub                | Both cohorts | Ontario, CA       | James Rusak (Dorset Environmental Science Centre)                   |
| ON.Crosson             | Both cohorts | Ontario, CA       | James Rusak (Dorset Environmental Science Centre)                   |
| ON.Dickie              | Both cohorts | Ontario, CA       | James Rusak (Dorset Environmental Science Centre)                   |
| ON.Harp                | Both cohorts | Ontario, CA       | James Rusak (Dorset Environmental Science Centre)                   |
| ON.Heney               | Both cohorts | Ontario, CA       | James Rusak (Dorset Environmental Science Centre)                   |
| ON.Opeongo             | 1985 cohort  | Ontario, CA       | Stephanie Melles (Ryerson University)                               |
| ON.Plastic             | Both cohorts | Ontario, CA       | James Rusak (Dorset Environmental Science Centre)                   |
| ON.RedChalkMain        | Both cohorts | Ontario, CA       | James Rusak (Dorset Environmental Science Centre)                   |
| PA.Beltzville          | 1985 cohort  | Pennsylvania, USA | Gregory Wacik (US Army Corps of Engineers)                          |
| PA.BlueMarsh           | 1985 cohort  | Pennsylvania, USA | Gregory Wacik (US Army Corps of Engineers)                          |
| PA.Giles               | 1985 cohort  | Pennsylvania, USA | Craig Williamson, Rachel Pilla (Miami University Ohio)              |
| PA.Lacawac             | 1985 cohort  | Pennsylvania, USA | Craig Williamson, Rachel Pilla (Miami University Ohio)              |
| PA.Wallenpaupack       | Both cohorts | Pennsylvania, USA | Nick Spinelli (Lake Wallenpaupack Watershed Management District)    |
| RI.DeepCharlestown     | 1985 cohort  | Rhode Island, USA | Elizabeth Herron (University of Rhode Island Cooperative Extension) |
| RI.Georgiaville        | 1985 cohort  | Rhode Island, USA | Elizabeth Herron (University of Rhode Island Cooperative Extension) |
| RI.HundredAcre         | 1985 cohort  | Rhode Island, USA | Elizabeth Herron (University of Rhode Island Cooperative Extension) |
| RI.SchoolhouseLower    | 1985 cohort  | Rhode Island, USA | Elizabeth Herron (University of Rhode Island Cooperative Extension) |
| RI.Watchaug            | 1985 cohort  | Rhode Island, USA | Elizabeth Herron (University of Rhode Island Cooperative Extension) |
| RI.White               | 1985 cohort  | Rhode Island, USA | Elizabeth Herron (University of Rhode Island Cooperative Extension) |
| RI.Yawgoo              | 1985 cohort  | Rhode Island, USA | Elizabeth Herron (University of Rhode Island Cooperative Extension) |
