# Supplementary material
Source: MDPI journal article supplement (https://www.mdpi.com/2073-4441/9/6/442)
Supplement: s1 [file s1]

# Transparency, geomorphology, and mixing regime explain variability in trends in lake temperature and stratification across northeastern North America (1975 - 2012)

David C. Richardson<sup>1\*</sup>, Stephanie J. Melles<sup>2</sup>, Rachel M. Pilla<sup>3a</sup>, Amy L. Hetherington<sup>4</sup>, Lesley B. Knoll<sup>5</sup>, Craig E. Williamson<sup>3b</sup>, Benjamin M. Kraemer<sup>6,7</sup>, James R. Jackson<sup>8a</sup>, Elizabeth C. Long<sup>9</sup>, Karen Moore<sup>10</sup>, Lars G. Rudstam<sup>8b</sup>, James A. Rusak<sup>11</sup>, Jasmine E. Saros<sup>12</sup>, Sapna Sharma<sup>13</sup>, Kristin E. Strock<sup>14</sup>, Kathleen C. Weathers<sup>15</sup>, Courtney R. Wigdahl-Perry<sup>16</sup>

<sup>1</sup> SUNY New Paltz; 1 Hawk Drive; New Paltz, New York 12561, US; richardsond@newpaltz.edu

<sup>2</sup> Ryerson University; 350 Victoria Street; Toronto, Ontario M5B 2K3, CA; stephanie.melles@ryerson.ca

<sup>3</sup> Miami University, Department of Biology; 700 E High Street; Oxford, Ohio 45056, US; <sup>a</sup>pillarm@miamioh.edu, <sup>b</sup>willia85@miamioh.edu

<sup>4</sup> Virginia Polytechnic Institute and State University; 2011 Derring Hall; 926 West Campus Drive; Blacksburg, Virginia 24061, US; amyheth@vt.edu

<sup>5</sup> University of Minnesota Twin Cities; Itasca Biological Station and Laboratories; 28131 University Circle; Lake Itasca, Minnesota 56470, US; lbknoll@umn.edu

<sup>6</sup> University of Wisconsin-Madison, 680 North Park Street, Madison, Wisconsin 53706, US

<sup>7</sup> Leibniz Institute of Freshwater Ecology and Inland Fisheries, Müggelseedamm 310, Berlin, Germany 12587, DE; ben.m.kraemer@gmail.com

<sup>8</sup> Cornell University Biological Field Station, Department of Natural Resources, 900 Shackelton Point Road, Bridgeport, New York 13030, US; <sup>a</sup>jrj26@cornell.edu, <sup>b</sup>lgr1@cornell.edu

<sup>9</sup> Mohonk Preserve, Daniel Smiley Research Center, P.O. Box 715, New Paltz, New York 12561, US; elong@mohonkpreserve.org

<sup>10</sup> New York City Department of Environmental Protection, 71 Smith Avenue Kingston, New York 12401, US; karenmoore@dep.nyc.gov

<sup>11</sup> Dorset Environmental Science Centre, Ontario Ministry of the Environment and Climate Change, P.O. Box 39, Dorset, Ontario, P0A1E0, CA; Jim.Rusak@ontario.ca

<sup>12</sup> University of Maine, 137 Sawyer Research Center, Orono, ME 04401, US; jasmine.saros@maine.edu

<sup>13</sup> Department of Biology, York University, Toronto, Ontario M3P1J3, CA; sharma11@yorku.ca

<sup>14</sup> Dickinson College, 28 North College Street, Carlisle, Pennsylvania 17013, US; strockk@dickinson.edu

<sup>15</sup> Cary Institute of Ecosystem Studies, Box AB, Millbrook, NY 12545, US; weathersk@caryinstitute.org

<sup>16</sup> State University of New York at Fredonia, 280 Central Avenue, Fredonia, NY 14063, US; courtney.wigdahl@fredonia.edu

\* Correspondence: richardsond@newpaltz.edu; Tel.: +01-845-257-3805

## Supporting Information

Table S2: All Thiel-Sen estimators (Sen's slopes) for 1975 cohort.

**Table S2.** The magnitude of trends from Sen's Slope analyses for each metric of lake thermal structure for the 1975 cohort for NENA lakes. NA values indicate that criteria for calculating that slope were not satisfied for a metric within a particular lake. Buoyancy frequency is the maximum buoyancy frequency in cph units (cycles per hour).

| Lake name                      | Near-surface<br>temperature<br>(°C year <sup>-1</sup> ) | Deepwater<br>temperature<br>(°C year <sup>-1</sup> ) | Mean lake<br>temperature<br>(°C year <sup>-1</sup> ) | Temperature<br>difference<br>(°C year <sup>-1</sup> ) | Buoyancy<br>Frequency<br>(CPH year <sup>-1</sup> ) | Density<br>Gradient<br>(kg m <sup>-3</sup> year <sup>-1</sup> ) |
|--------------------------------|---------------------------------------------------------|------------------------------------------------------|------------------------------------------------------|-------------------------------------------------------|----------------------------------------------------|-----------------------------------------------------------------|
| ME.AnnabessacookLake.9961      | 0.020                                                   | 0.003                                                | 0.020                                                | 0.001                                                 | 0.683                                              | 0.0005                                                          |
| ME.AuburnLake.3748             | 0.100                                                   | 0.018                                                | 0.074                                                | 0.018                                                 | 2.078                                              | 0.0011                                                          |
| ME.Bear&LittleBearPds.3624     | 0.045                                                   | -0.081                                               | 0.084                                                | -0.023                                                | -0.045                                             | 0.0028                                                          |
| ME.BearPond.3420               | 0.022                                                   | 0.022                                                | -0.008                                               | 0.003                                                 | 1.630                                              | 0.0003                                                          |
| ME.BerryPond.3828              | -0.021                                                  | -0.118                                               | 0.092                                                | -0.067                                                | 1.095                                              | 0.0025                                                          |
| ME.CarltonPond.5310            | 0.046                                                   | 0.029                                                | 0.015                                                | 0.025                                                 | 0.510                                              | 0.0005                                                          |
| ME.CathanceLake.9661           | 0.077                                                   | -0.050                                               | 0.114                                                | 0.044                                                 | 3.728                                              | 0.0023                                                          |
| ME.ChickawaukiePond.4822       | 0.028                                                   | -0.032                                               | 0.035                                                | 0.013                                                 | 2.683                                              | 0.0014                                                          |
| ME.Clary(Pleasant)Lake.5382    | 0.032                                                   | -0.038                                               | 0.070                                                | -0.010                                                | 2.720                                              | 0.0035                                                          |
| ME.CobbosseeconteeLake.5236    | 0.045                                                   | 0.012                                                | 0.022                                                | -0.006                                                | 0.852                                              | 0.0004                                                          |
| ME.CochnewagonPond.3814        | 0.011                                                   | -0.068                                               | 0.111                                                | -0.016                                                | 3.207                                              | 0.0039                                                          |
| ME.Crystal(Anonymous)Lake.3452 | 0.033                                                   | 0.016                                                | 0.019                                                | 0.031                                                 | 3.582                                              | 0.0005                                                          |
| ME.DamariscottaLake.5400       | 0.110                                                   | NA                                                   | NA                                                   | 0.041                                                 | 0.199                                              | NA                                                              |
| ME.DexterPond.3830             | 0.002                                                   | -0.114                                               | 0.140                                                | -0.046                                                | 1.640                                              | 0.0045                                                          |
| ME.DuckpuddlePond.5702         | 0.059                                                   | -0.013                                               | 0.069                                                | 0.015                                                 | 0.202                                              | 0.0039                                                          |
| ME.EastPond.5349               | 0.061                                                   | 0.012                                                | 0.031                                                | 0.038                                                 | 2.383                                              | 0.0021                                                          |
| ME.EmbdenPond.78               | 0.039                                                   | NA                                                   | NA                                                   | -0.036                                                | 4.126                                              | NA                                                              |
| ME.GreatPond.5274              | 0.117                                                   | 0.134                                                | 0.050                                                | 0.107                                                 | 1.149                                              | 0.0015                                                          |
| ME.GreenLake.4294              | 0.045                                                   | NA                                                   | NA                                                   | 0.009                                                 | 0.944                                              | NA                                                              |
| ME.HaleyPond.3534              | 0.116                                                   | 0.070                                                | 0.043                                                | 0.088                                                 | 3.561                                              | 0.0024                                                          |
| ME.HancockPond.3132            | 0.100                                                   | 0.040                                                | 0.065                                                | 0.002                                                 | 2.947                                              | 0.0016                                                          |
| ME.HighlandLake.3454           | 0.010                                                   | -0.011                                               | 0.045                                                | -0.024                                                | -0.928                                             | 0.0006                                                          |
| ME.KeysPond.3232               | 0.088                                                   | -0.005                                               | 0.100                                                | -0.036                                                | 2.268                                              | 0.0024                                                          |
| ME.KezarLake.97                | 0.141                                                   | NA                                                   | NA                                                   | 0.019                                                 | 2.421                                              | NA                                                              |
| ME.LittleCobbosseecontee.8065  | 0.080                                                   | 0.028                                                | 0.043                                                | 0.027                                                 | 2.158                                              | 0.0025                                                          |
| ME.LittleOssipeeLake.5024      | 0.075                                                   | NA                                                   | NA                                                   | -0.017                                                | 3.580                                              | NA                                                              |
| ME.LittlePennesseewassee.367   | 0.068                                                   | -0.017                                               | 0.040                                                | -0.008                                                | 2.174                                              | 0.0021                                                          |
| ME.LittleSebagoLake.3714       | 0.100                                                   | 0.024                                                | 0.123                                                | 0.007                                                 | 2.075                                              | 0.0024                                                          |
| ME.LongLake.5780               | 0.061                                                   | -0.046                                               | 0.109                                                | -0.007                                                | 2.023                                              | 0.0017                                                          |

|                                  |        |        |        |        |        |         |
|----------------------------------|--------|--------|--------|--------|--------|---------|
| ME.LongPond.5272                 | 0.114  | 0.064  | 0.062  | 0.074  | 1.772  | 0.0014  |
| ME.LowerNarrowsPond.103          | 0.025  | 0.008  | 0.019  | 0.000  | -0.547 | 0.0002  |
| ME.MadawaskaLake.1802            | 0.025  | -0.088 | 0.065  | -0.014 | 2.499  | 0.0016  |
| ME.MaranacookLake.5312           | 0.071  | 0.014  | 0.036  | 0.015  | 0.599  | 0.0003  |
| ME.McGrathPond.5348              | NA     | 0.066  | NA     | NA     | NA     | NA      |
| ME.MessalonskeeLake.5280         | 0.086  | -0.025 | 0.174  | 0.039  | 2.211  | 0.0026  |
| ME.MoosePond.2590                | 0.104  | 0.022  | 0.085  | NA     | NA     | 0.0017  |
| ME.MoosePond.3134                | 0.033  | -0.008 | 0.064  | -0.031 | 2.508  | 0.0010  |
| ME.MousamLake.3838               | 0.069  | 0.014  | 0.055  | 0.017  | 1.737  | 0.0008  |
| ME.NorthLake(LittlePond).5344    | 0.039  | 0.050  | -0.003 | 0.048  | 1.467  | -0.0001 |
| ME.NorthPond.3500                | 0.047  | NA     | NA     | 0.045  | -0.885 | NA      |
| ME.PeabodyPond.3374              | 0.112  | 0.020  | 0.072  | 0.023  | 1.675  | 0.0018  |
| ME.PemaquidPond.5704             | 0.050  | -0.006 | 0.073  | -0.016 | -0.497 | 0.0011  |
| ME.PennesseewasseeLake.3434      | 0.080  | -0.014 | 0.140  | 0.042  | 1.811  | 0.0027  |
| ME.PleasantLake.3446             | 0.160  | 0.000  | 0.172  | 0.054  | 5.347  | 0.0026  |
| ME.PleasantPond.3822             | 0.068  | 0.001  | 0.087  | 0.003  | 1.200  | 0.0011  |
| ME.SabattusPond.3796             | 0.029  | 0.045  | -0.009 | 0.037  | 0.729  | -0.0006 |
| ME.SalmonPond(EllisPond).5352    | 0.077  | 0.027  | 0.040  | 0.038  | 1.582  | 0.0012  |
| ME.SandPond(TacomaLakes).5238    | 0.053  | -0.002 | 0.035  | 0.001  | 0.879  | 0.0010  |
| ME.SandPond.3432                 | 0.086  | NA     | NA     | NA     | NA     | NA      |
| ME.SebasticookLake.2264          | 0.052  | 0.003  | 0.056  | 0.021  | -0.894 | 0.0010  |
| ME.SquarePond.3916               | 0.065  | -0.094 | 0.152  | 0.007  | 2.795  | 0.0040  |
| ME.StGeorgeLake.9971             | 0.117  | 0.086  | 0.035  | 0.072  | 0.207  | 0.0016  |
| ME.SwanLake(GoosePond).5492      | 0.115  | 0.044  | 0.074  | 0.066  | 3.460  | 0.0010  |
| ME.TaylorPond.3750               | 0.062  | -0.091 | 0.190  | -0.031 | 1.960  | 0.0032  |
| ME.ThompsonLake(TheHeath).3444   | 0.044  | NA     | NA     | 0.024  | 2.858  | NA      |
| ME.ThreemilePond.5416            | 0.040  | 0.003  | 0.042  | 0.017  | 1.068  | 0.0014  |
| ME.TogusPond.9931                | 0.109  | 0.009  | 0.100  | 0.034  | 2.058  | 0.0020  |
| ME.ToothakerPond.2336            | 0.075  | NA     | NA     | 0.080  | -1.199 | NA      |
| ME.Torsey(Greeley)Lake.5307      | 0.062  | 0.000  | 0.033  | -0.006 | 2.027  | 0.0013  |
| ME.TrickyPond.3382               | 0.056  | -0.030 | 0.097  | -0.001 | 2.415  | 0.0011  |
| ME.TrippPond.3758                | -0.033 | -0.038 | 0.012  | -0.008 | -2.628 | 0.0000  |
| ME.UnityPond(WinnecookLake).5172 | 0.041  | -0.033 | 0.081  | NA     | NA     | 0.0022  |
| ME.UpperPleasant(Mud)Pond.5254   | 0.029  | -0.045 | 0.073  | 0.001  | 0.754  | 0.0027  |
| ME.UpperRangePond.3688           | 0.082  | 0.053  | 0.043  | NA     | NA     | 0.0019  |
| ME.Webb(Weld)Lake.3672           | 0.077  | 0.010  | 0.065  | 0.004  | 1.031  | 0.0015  |

|                        |        |        |        |        |        |         |
|------------------------|--------|--------|--------|--------|--------|---------|
| ME.WebberPond.5408     | 0.029  | -0.035 | 0.031  | -0.017 | 1.767  | 0.0004  |
| ME.WilsonPond.3832     | 0.028  | 0.000  | 0.038  | -0.016 | 1.912  | 0.0009  |
| ME.WoodsPond.3456      | 0.081  | -0.114 | 0.207  | 0.010  | 3.810  | 0.0080  |
| ME.WorthleyPond.3594   | 0.071  | 0.013  | 0.066  | NA     | NA     | 0.0014  |
| NY.ADK.EastLake        | 0.048  | -0.060 | 0.111  | NA     | NA     | 0.0016  |
| NY.ADK.FirstBisbyLake  | 0.099  | -0.045 | 0.150  | -0.044 | 3.631  | 0.0016  |
| NY.ADK.HonnedagaLake   | 0.075  | -0.135 | 0.220  | -0.096 | 3.680  | 0.0012  |
| NY.ADK.LittleMooseLake | 0.081  | -0.027 | 0.111  | -0.018 | 2.104  | 0.0010  |
| NY.ADK.PantherLake     | 0.079  | 0.012  | 0.022  | 0.039  | 4.606  | 0.0012  |
| NY.LakeGeorge          | 0.063  | NA     | NA     | 0.014  | 0.671  | NA      |
| NY.Oneida              | 0.034  | 0.048  | -0.017 | 0.034  | -0.799 | -0.0003 |
| ON.BlueChalk           | -0.026 | -0.009 | -0.022 | -0.025 | 1.132  | -0.0003 |
| ON.Chub                | 0.020  | 0.008  | 0.016  | -0.004 | 1.110  | 0.0002  |
| ON.Crosson             | -0.057 | -0.006 | -0.050 | -0.023 | 1.903  | -0.0007 |
| ON.Dickie              | -0.057 | -0.016 | -0.051 | -0.026 | 0.830  | -0.0016 |
| ON.Harp                | -0.009 | 0.008  | -0.020 | 0.002  | -0.364 | -0.0001 |
| ON.Heney               | -0.019 | -0.039 | 0.009  | -0.037 | 2.250  | 0.0007  |
| ON.Plastic             | 0.021  | 0.011  | 0.000  | 0.012  | 1.008  | 0.0003  |
| ON.RedChalkMain        | -0.028 | -0.008 | -0.020 | -0.022 | 0.115  | -0.0002 |
| PA.Wallenpaupack       | 0.000  | -0.060 | 0.063  | -0.013 | 0.397  | 0.0007  |
