# Supplementary material
Source: MDPI journal article supplement (https://www.mdpi.com/2073-4441/9/6/442)
Supplement: s1 [file s1]

# Transparency, geomorphology, and mixing regime explain variability in trends in lake temperature and stratification across northeastern North America (1975 - 2012)

David C. Richardson<sup>1\*</sup>, Stephanie J. Melles<sup>2</sup>, Rachel M. Pilla<sup>3a</sup>, Amy L. Hetherington<sup>4</sup>, Lesley B. Knoll<sup>5</sup>, Craig E. Williamson<sup>3b</sup>, Benjamin M. Kraemer<sup>6,7</sup>, James R. Jackson<sup>8a</sup>, Elizabeth C. Long<sup>9</sup>, Karen Moore<sup>10</sup>, Lars G. Rudstam<sup>8b</sup>, James A. Rusak<sup>11</sup>, Jasmine E. Saros<sup>12</sup>, Sapna Sharma<sup>13</sup>, Kristin E. Strock<sup>14</sup>, Kathleen C. Weathers<sup>15</sup>, Courtney R. Wigdahl-Perry<sup>16</sup>

<sup>1</sup> SUNY New Paltz; 1 Hawk Drive; New Paltz, New York 12561, US; richardsond@newpaltz.edu

<sup>2</sup> Ryerson University; 350 Victoria Street; Toronto, Ontario M5B 2K3, CA; stephanie.melles@ryerson.ca

<sup>3</sup> Miami University, Department of Biology; 700 E High Street; Oxford, Ohio 45056, US; <sup>a</sup>pillarm@miamioh.edu, <sup>b</sup>willia85@miamioh.edu

<sup>4</sup> Virginia Polytechnic Institute and State University; 2011 Derring Hall; 926 West Campus Drive; Blacksburg, Virginia 24061, US; amyheth@vt.edu

<sup>5</sup> University of Minnesota Twin Cities; Itasca Biological Station and Laboratories; 28131 University Circle; Lake Itasca, Minnesota 56470, US; lbknoll@umn.edu

<sup>6</sup> University of Wisconsin-Madison, 680 North Park Street, Madison, Wisconsin 53706, US

<sup>7</sup> Leibniz Institute of Freshwater Ecology and Inland Fisheries, Müggelseedamm 310, Berlin, Germany 12587, DE; ben.m.kraemer@gmail.com

<sup>8</sup> Cornell University Biological Field Station, Department of Natural Resources, 900 Shackelton Point Road, Bridgeport, New York 13030, US; <sup>a</sup>jrj26@cornell.edu, <sup>b</sup>lgr1@cornell.edu

<sup>9</sup> Mohonk Preserve, Daniel Smiley Research Center, P.O. Box 715, New Paltz, New York 12561, US; elong@mohonkpreserve.org

<sup>10</sup> New York City Department of Environmental Protection, 71 Smith Avenue Kingston, New York 12401, US; karenmoore@dep.nyc.gov

<sup>11</sup> Dorset Environmental Science Centre, Ontario Ministry of the Environment and Climate Change, P.O. Box 39, Dorset, Ontario, P0A1E0, CA; Jim.Rusak@ontario.ca

<sup>12</sup> University of Maine, 137 Sawyer Research Center, Orono, ME 04401, US; jasmine.saros@maine.edu

<sup>13</sup> Department of Biology, York University, Toronto, Ontario M3P1J3, CA; sharma11@yorku.ca

<sup>14</sup> Dickinson College, 28 North College Street, Carlisle, Pennsylvania 17013, US; strockk@dickinson.edu

<sup>15</sup> Cary Institute of Ecosystem Studies, Box AB, Millbrook, NY 12545, US; weathersk@caryinstitute.org

<sup>16</sup> State University of New York at Fredonia, 280 Central Avenue, Fredonia, NY 14063, US; courtney.wigdahl@fredonia.edu

\* Correspondence: richardsond@newpaltz.edu; Tel.: +01-845-257-3805

## Supporting Information

Table S3: All Thiel-Sen estimators (Sen's slopes) for 1985 cohort.

**Table S3.** The magnitude of trends from Sen's Slope analyses for each metric of lake thermal structure for the 1985 cohort for NENA lakes. NA values indicate that criteria for calculating that slope were not satisfied for a metric within a particular lake. Buoyancy frequency is the maximum buoyancy frequency in cph units (cycles per hour).

| Lake name                           | Near-surface<br>temperature<br>(°C year <sup>-1</sup> ) | Deepwater<br>temperature<br>(°C year <sup>-1</sup> ) | Mean lake<br>temperature<br>(°C year <sup>-1</sup> ) | Temperature<br>difference<br>(°C year <sup>-1</sup> ) | Buoyancy<br>Frequency<br>(cph year <sup>-1</sup> ) | Density<br>Gradient<br>(kg m <sup>-3</sup> year <sup>-1</sup> ) |
|-------------------------------------|---------------------------------------------------------|------------------------------------------------------|------------------------------------------------------|-------------------------------------------------------|----------------------------------------------------|-----------------------------------------------------------------|
| MA.Quabbin                          | 0.044                                                   | -0.039                                               | 0.065                                                | 0.002                                                 | 7.914                                              | 0.0003                                                          |
| ME.AdamsPond.3396                   | 0.080                                                   | -0.029                                               | 0.091                                                | -0.058                                                | 1.077                                              | 0.0017                                                          |
| ME.AdamsPond.5366                   | 0.222                                                   | 0.032                                                | 0.205                                                | NA                                                    | NA                                                 | 0.0131                                                          |
| ME.AndroscogginLake.3836            | -0.008                                                  | -0.129                                               | 0.150                                                | -0.102                                                | 4.266                                              | 0.0033                                                          |
| ME.AnnabessacookLake.9961           | 0.051                                                   | -0.006                                               | 0.059                                                | -0.003                                                | 2.340                                              | 0.0015                                                          |
| ME.AuburnLake.3748                  | 0.109                                                   | 0.009                                                | 0.096                                                | 0.027                                                 | 2.114                                              | 0.0014                                                          |
| ME.Bear&LittleBearPds.3624          | 0.042                                                   | -0.109                                               | 0.116                                                | -0.026                                                | -0.154                                             | 0.0037                                                          |
| ME.BearPond.3420                    | 0.042                                                   | 0.012                                                | 0.018                                                | 0.003                                                 | 1.630                                              | 0.0006                                                          |
| ME.BeaverPond.5582                  | 0.079                                                   | 0.020                                                | 0.038                                                | -0.011                                                | 3.085                                              | 0.0029                                                          |
| ME.BeechHillPond.4352               | 0.145                                                   | NA                                                   | NA                                                   | 0.028                                                 | 3.286                                              | NA                                                              |
| ME.BerryPond.3828                   | -0.003                                                  | -0.133                                               | 0.108                                                | -0.064                                                | 2.209                                              | 0.0035                                                          |
| ME.BiscayPond.5710                  | -0.048                                                  | -0.030                                               | 0.030                                                | 0.015                                                 | 1.083                                              | -0.0001                                                         |
| ME.BranchLake.4328                  | 0.066                                                   | NA                                                   | NA                                                   | NA                                                    | NA                                                 | NA                                                              |
| ME.BryantPond(LakeChristopher).3464 | 0.295                                                   | 0.015                                                | 0.256                                                | 0.083                                                 | 2.029                                              | 0.0046                                                          |
| ME.Bubble                           | 0.089                                                   | -0.115                                               | 0.144                                                | 0.014                                                 | 10.098                                             | 0.0035                                                          |
| ME.CarltonPond.5310                 | 0.027                                                   | 0.016                                                | 0.018                                                | 0.019                                                 | 1.671                                              | 0.0005                                                          |
| ME.CathanceLake.9661                | 0.046                                                   | -0.106                                               | 0.108                                                | -0.021                                                | 1.876                                              | 0.0022                                                          |
| ME.ChickawaukiePond.4822            | 0.004                                                   | -0.031                                               | 0.024                                                | 0.008                                                 | 2.625                                              | 0.0006                                                          |
| ME.ChinaLake.5448                   | 0.049                                                   | 0.002                                                | 0.022                                                | -0.009                                                | 2.219                                              | 0.0004                                                          |
| ME.Clary(Pleasant)Lake.5382         | 0.016                                                   | -0.086                                               | 0.080                                                | -0.021                                                | 4.685                                              | 0.0036                                                          |
| ME.CobbosseeconteeLake.5236         | 0.038                                                   | 0.004                                                | 0.020                                                | -0.003                                                | 1.124                                              | 0.0002                                                          |
| ME.CochnewagonPond.3814             | 0.012                                                   | -0.100                                               | 0.150                                                | -0.031                                                | 3.358                                              | 0.0053                                                          |
| ME.ColdRainPond.3376                | 0.070                                                   | -0.017                                               | 0.076                                                | -0.067                                                | 1.502                                              | 0.0028                                                          |
| ME.ColdStreamPond.2146              | -0.049                                                  | NA                                                   | NA                                                   | NA                                                    | NA                                                 | NA                                                              |
| ME.Crescent(Rattlesnake)Lake.3696   | 0.098                                                   | 0.035                                                | 0.073                                                | 0.026                                                 | 3.816                                              | 0.0019                                                          |
| ME.CrossLake.1674                   | -0.008                                                  | 0.000                                                | -0.023                                               | 0.007                                                 | 2.593                                              | -0.0003                                                         |
| ME.Crystal(Anonymous)Lake.3452      | 0.032                                                   | 0.016                                                | 0.019                                                | 0.031                                                 | 3.582                                              | 0.0005                                                          |
| ME.Crystal(Beals)Pond.3626          | 0.096                                                   | -0.031                                               | 0.112                                                | -0.031                                                | 3.279                                              | 0.0028                                                          |

|                                           |        |        |        |        |        |         |
|-------------------------------------------|--------|--------|--------|--------|--------|---------|
| ME.DamariscottaLake.5400                  | 0.050  | NA     | NA     | 0.046  | -0.536 | NA      |
| ME.DexterPond.3830                        | 0.005  | -0.150 | 0.165  | -0.071 | 1.664  | 0.0055  |
| ME.DuckpuddlePond.5702                    | 0.000  | 0.002  | -0.047 | -0.016 | 0.196  | -0.0018 |
| ME.Eagle                                  | 0.064  | 0.014  | -0.003 | 0.000  | 0.800  | 0.0003  |
| ME.EastPond.5349                          | 0.086  | 0.039  | 0.034  | 0.074  | 3.377  | 0.0024  |
| ME.EchoLake(CrotchedPond).5814            | 0.057  | NA     | NA     | NA     | NA     | NA      |
| ME.EchoLake.4624                          | 0.076  | -0.050 | 0.118  | -0.006 | 1.528  | 0.0016  |
| ME.EmbdenPond.78                          | 0.054  | NA     | NA     | -0.036 | 4.126  | NA      |
| ME.FlyingPond.5182                        | -0.068 | -0.077 | 0.000  | -0.061 | 2.130  | -0.0005 |
| ME.GreatPond.5274                         | 0.115  | 0.131  | 0.033  | 0.122  | 0.684  | 0.0014  |
| ME.GreenLake.4294                         | 0.025  | NA     | NA     | 0.015  | 0.117  | NA      |
| ME.HaleyPond.3534                         | 0.022  | 0.015  | 0.011  | 0.020  | -3.972 | 0.0001  |
| ME.HancockPond.3132                       | 0.088  | 0.031  | 0.050  | 0.003  | 3.067  | 0.0013  |
| ME.HealdPond.3222                         | 0.117  | 0.110  | 0.044  | 0.094  | 4.768  | 0.0034  |
| ME.HighlandLake.3454                      | 0.033  | -0.020 | 0.075  | -0.032 | -2.416 | 0.0011  |
| ME.HighlandLake.3734                      | 0.084  | 0.019  | 0.043  | -0.022 | 1.165  | 0.0010  |
| ME.HornePond.3408                         | 0.164  | NA     | NA     | 0.058  | -0.756 | NA      |
| ME.Ingalls(Foster's)Pond.3188             | 0.067  | -0.120 | 0.158  | 0.004  | 3.887  | 0.0088  |
| ME.IslandPond.3448                        | 0.029  | -0.010 | 0.006  | -0.071 | -0.006 | 0.0007  |
| ME.Jordan                                 | 0.050  | 0.016  | 0.072  | -0.004 | 0.975  | 0.0004  |
| ME.KennebagoLake.2374                     | 0.067  | NA     | NA     | NA     | NA     | NA      |
| ME.KeokaLake.3416                         | 0.020  | 0.018  | -0.004 | -0.007 | 0.236  | 0.0008  |
| ME.KeysPond.3232                          | 0.061  | -0.005 | 0.049  | -0.042 | 1.679  | 0.0014  |
| ME.KezarLake.97                           | 0.127  | NA     | NA     | 0.020  | 2.015  | NA      |
| ME.LakeAnasagunticook.3604                | 0.174  | 0.058  | 0.069  | 0.081  | 3.076  | 0.0039  |
| ME.LittleCobbosseecontee.8065             | 0.042  | 0.023  | 0.010  | 0.022  | 2.847  | 0.0013  |
| ME.LittlePennesseewassee.367              | 0.067  | 0.015  | 0.033  | 0.001  | 1.585  | 0.0021  |
| ME.LittleSebagoLake.3714                  | 0.104  | 0.000  | 0.110  | -0.029 | 1.869  | 0.0023  |
| ME.LittleWilson(French,Ramsdell)Pond.3784 | 0.176  | 0.000  | 0.191  | 0.001  | 2.995  | 0.0033  |
| ME.Long(McWain)Pond.3418                  | 0.018  | 0.003  | -0.003 | -0.032 | 0.214  | 0.0001  |
| ME.LongLake.5780                          | 0.007  | -0.003 | 0.022  | 0.003  | 1.179  | 0.0001  |
| ME.LongPond.3084                          | -0.043 | -0.055 | -0.014 | -0.087 | 5.147  | -0.0010 |
| ME.LongPond.4622                          | 0.025  | 0.021  | 0.022  | -0.008 | -2.426 | 0.0004  |
| ME.LongPond.5272                          | 0.029  | 0.024  | 0.018  | 0.035  | 1.516  | 0.0003  |

|                                          |        |        |        |        |        |         |
|------------------------------------------|--------|--------|--------|--------|--------|---------|
| ME.LovejoyPond.5176                      | -0.188 | -0.055 | 0.017  | -0.073 | -1.527 | -0.0005 |
| ME.LowerNarrowsPond.103                  | -0.020 | 0.010  | -0.015 | -0.010 | -0.734 | -0.0002 |
| ME.MadawaskaLake.1802                    | 0.030  | -0.075 | 0.075  | -0.010 | 2.881  | 0.0016  |
| ME.MaranacookLake.5312                   | 0.044  | 0.015  | 0.025  | 0.018  | 0.882  | 0.0003  |
| ME.Meduxnekeag(Drews)Lake.1736           | 0.165  | 0.295  | -0.040 | 0.262  | -0.173 | 0.0013  |
| ME.MegunticookLake.4852                  | 0.100  | 0.000  | 0.038  | NA     | NA     | 0.0009  |
| ME.MessalonskeeLake.5280                 | -0.024 | 0.138  | -0.141 | 0.018  | -0.151 | -0.0014 |
| ME.MiddleRangePond.3762                  | 0.071  | 0.026  | 0.048  | 0.054  | 1.456  | 0.0007  |
| ME.Mooselookmeguntic(Cupsuptic)Lake.3302 | 0.001  | 0.027  | -0.005 | 0.064  | 3.120  | 0.0002  |
| ME.MoosePond.2590                        | 0.100  | 0.014  | 0.080  | 0.035  | 2.440  | 0.0016  |
| ME.MoosePond.3134                        | 0.031  | -0.015 | 0.058  | -0.049 | 2.799  | 0.0009  |
| ME.MoosePond.3424                        | 0.048  | -0.009 | 0.044  | -0.014 | 1.318  | 0.0013  |
| ME.MountainyPond.4292                    | 0.009  | -0.030 | 0.021  | 0.027  | 1.526  | 0.0007  |
| ME.MousamLake.3838                       | 0.120  | -0.006 | 0.109  | 0.019  | 0.881  | 0.0014  |
| ME.NequassetLake.5222                    | 0.103  | 0.017  | 0.089  | 0.036  | 0.460  | 0.0012  |
| ME.NorthLake(LittlePond).5344            | -0.002 | 0.011  | -0.008 | 0.004  | 0.479  | -0.0007 |
| ME.NorthPond.3500                        | 0.057  | NA     | NA     | 0.071  | -1.202 | NA      |
| ME.OtterPond.3458                        | 0.014  | 0.000  | -0.012 | 0.003  | 1.287  | -0.0010 |
| ME.PantherPond.3694                      | 0.100  | 0.000  | 0.093  | 0.013  | 2.371  | 0.0016  |
| ME.PapoosePond.3414                      | -0.044 | NA     | NA     | -0.093 | 1.951  | NA      |
| ME.ParkerPond.5186                       | -0.056 | 0.020  | -0.061 | -0.009 | 2.690  | -0.0007 |
| ME.PeabodyPond.3374                      | 0.112  | 0.017  | 0.072  | 0.018  | 1.286  | 0.0019  |
| ME.PemaquidPond.5704                     | 0.100  | -0.005 | 0.100  | -0.021 | -2.605 | 0.0019  |
| ME.PennesseewasseeLake.3434              | 0.097  | 0.015  | 0.089  | 0.038  | 1.620  | 0.0022  |
| ME.PleasantLake.3446                     | 0.127  | 0.000  | 0.116  | 0.049  | 6.232  | 0.0023  |
| ME.PleasantPond.3822                     | 0.064  | -0.012 | 0.110  | -0.010 | 1.596  | 0.0010  |
| ME.QuimbyPond.3526                       | 0.048  | NA     | NA     | 0.047  | 0.000  | NA      |
| ME.Rangeley(Oquossoc)Lake.3300           | 0.016  | NA     | NA     | NA     | NA     | NA      |
| ME.RaymondPond.3690                      | 0.112  | -0.050 | 0.106  | 0.027  | 1.865  | 0.0023  |
| ME.SabattusPond.3796                     | 0.100  | 0.079  | 0.000  | 0.095  | 3.451  | -0.0001 |
| ME.SabbathdayLake.3700                   | 0.132  | 0.038  | 0.100  | 0.059  | 1.521  | 0.0022  |
| ME.SaddlebackLake.3536                   | 0.021  | NA     | NA     | -0.017 | 1.752  | NA      |
| ME.SalmonPond(EllisPond).5352            | 0.068  | 0.042  | 0.000  | 0.042  | 1.005  | 0.0007  |
| ME.Sand(Walden)Pond.3130                 | 0.136  | 0.021  | 0.105  | -0.005 | 2.507  | 0.0030  |

|                                  |        |        |        |        |        |         |
|----------------------------------|--------|--------|--------|--------|--------|---------|
| ME.SandPond(TacomaLakes).5238    | 0.050  | -0.008 | 0.035  | 0.001  | 0.879  | 0.0010  |
| ME.SandPond.3432                 | 0.112  | NA     | NA     | NA     | NA     | NA      |
| ME.SealCovePond.4630             | 0.064  | -0.055 | 0.106  | -0.002 | -0.191 | 0.0021  |
| ME.SeabasticookLake.2264         | 0.004  | -0.018 | 0.033  | -0.012 | -1.719 | 0.0004  |
| ME.SewallPond.9943               | 0.124  | NA     | NA     | 0.112  | 2.882  | NA      |
| ME.SquarePond.3916               | 0.039  | -0.076 | 0.104  | -0.006 | 3.165  | 0.0027  |
| ME.StearnsPond.3234              | 0.125  | 0.039  | 0.071  | -0.024 | 1.291  | 0.0023  |
| ME.StGeorgeLake.9971             | 0.117  | 0.110  | 0.009  | 0.042  | -0.815 | 0.0016  |
| ME.SwanLake(GoosePond).5492      | 0.133  | 0.062  | 0.050  | 0.081  | 3.993  | 0.0009  |
| ME.TaylorPond.3750               | 0.069  | 0.000  | 0.079  | 0.020  | 2.260  | 0.0017  |
| ME.ThomasPond.3392               | 0.125  | -0.043 | 0.136  | -0.034 | 3.000  | 0.0022  |
| ME.ThompsonLake(TheHeath).3444   | 0.063  | NA     | NA     | 0.042  | 2.711  | NA      |
| ME.ThreemilePond.5416            | 0.053  | -0.062 | 0.109  | -0.003 | 1.639  | 0.0028  |
| ME.TogusPond.9931                | 0.088  | -0.004 | 0.119  | 0.026  | 2.972  | 0.0020  |
| ME.Torsey(Greeley)Lake.5307      | 0.052  | 0.000  | 0.042  | 0.004  | 2.482  | 0.0013  |
| ME.TrickyPond.3382               | 0.038  | -0.030 | 0.094  | -0.015 | 2.903  | 0.0010  |
| ME.TrippPond.3758                | 0.019  | -0.017 | 0.064  | 0.021  | -2.217 | 0.0027  |
| ME.UnityPond(WinnecookLake).5172 | 0.052  | -0.019 | 0.065  | 0.053  | 2.820  | 0.0020  |
| ME.UpperPleasant(Mud)Pond.5254   | -0.001 | -0.065 | 0.067  | -0.011 | 0.939  | 0.0024  |
| ME.WalkerPond.4640               | 0.048  | -0.133 | 0.158  | -0.046 | 2.181  | 0.0027  |
| ME.WashingtonPond.4894           | 0.104  | -0.046 | 0.113  | NA     | NA     | 0.0038  |
| ME.Webb(Weld)Lake.3672           | 0.061  | -0.016 | 0.080  | 0.003  | 1.123  | 0.0018  |
| ME.WebberPond.5408               | 0.000  | -0.050 | 0.010  | -0.048 | 2.678  | -0.0004 |
| ME.WesserunsettLake.70           | 0.033  | 0.033  | 0.010  | 0.018  | 4.066  | 0.0006  |
| ME.WilsonLake.3920               | 0.136  | -0.002 | 0.125  | -0.076 | 4.207  | 0.0032  |
| ME.WilsonPond.3832               | 0.031  | 0.013  | 0.025  | -0.022 | 3.006  | 0.0008  |
| ME.WoodsPond.3456                | 0.050  | -0.125 | 0.212  | -0.015 | 3.963  | 0.0079  |
| NH.ARMINGTONLAKE.ARMPIED         | -0.042 | -0.041 | 0.071  | -0.044 | -1.589 | 0.0017  |
| NH.ASHUELOTPOND.ASHWASD          | 0.064  | 0.083  | 0.000  | 0.064  | 1.413  | 0.0010  |
| NH.AYERSPOND.AYEBARD             | 0.000  | 0.000  | -0.021 | -0.022 | -0.082 | 0.0005  |
| NH.BAXTERLAKE.BAXFARD            | 0.052  | NA     | NA     | 0.012  | 1.658  | NA      |
| NH.BLAISDELLLAKE.BLASUTD         | 0.102  | 0.083  | 0.009  | 0.088  | 1.631  | 0.0017  |
| NH.BROADBAY.BROOSSD              | 0.035  | 0.066  | 0.000  | 0.036  | 2.408  | 0.0003  |
| NH.CANAANSTREETLAKE.CANCAND      | 0.067  | 0.091  | -0.005 | 0.056  | -1.153 | -0.0005 |

|                              |        |        |        |        |        |         |
|------------------------------|--------|--------|--------|--------|--------|---------|
| NH.CENTERPOND.CENSTDD        | 0.033  | 0.067  | -0.042 | 0.029  | -0.044 | -0.0001 |
| NH.CHALKPOND.CHANBYD         | 0.176  | NA     | NA     | 0.177  | 0.000  | NA      |
| NH.CHASEPOND.CHAWLMD         | 0.047  | NA     | NA     | 0.042  | -1.729 | NA      |
| NH.CLOUGHPOND.CLOLOUD        | 0.058  | 0.003  | 0.050  | 0.028  | 0.009  | 0.0013  |
| NH.COBBETTSPOND.COBWINS      | 0.025  | -0.011 | 0.033  | -0.020 | 1.820  | 0.0005  |
| NH.CRYSTALLAKE.CRYGLMD       | 0.007  | 0.041  | -0.078 | -0.005 | 0.756  | -0.0006 |
| NH.DEERINGRESERVOIR.DEEDRGD  | 0.051  | 0.088  | -0.036 | 0.089  | -0.899 | -0.0004 |
| NH.DUTCHMANPOND.DUTSPRD      | 0.173  | NA     | NA     | NA     | NA     | NA      |
| NH.EASTMANPOND.EASGTMD       | 0.014  | -0.100 | 0.071  | 0.015  | -1.674 | 0.0008  |
| NH.FORESTLAKE.FORDALD        | 0.022  | 0.042  | 0.000  | 0.030  | 0.028  | 0.0000  |
| NH.FORESTLAKE.FORWCHD        | -0.091 | 0.044  | -0.125 | -0.030 | -1.094 | -0.0036 |
| NH.GOVERNORSLAKE.GOVRAYD     | 0.243  | NA     | NA     | NA     | NA     | NA      |
| NH.GRANITELAKE.GRASTDD       | 0.081  | 0.028  | 0.052  | -0.038 | -0.129 | 0.0007  |
| NH.HALFMOONLAKE.HALALTD      | 0.075  | 0.058  | -0.061 | 0.063  | -1.512 | -0.0012 |
| NH.HARRISVILLEPOND.HARHARD   | -0.014 | -0.017 | -0.011 | -0.071 | -0.328 | -0.0005 |
| NH.HIGHLANDLAKE.HIGANDD      | 0.228  | 0.038  | 0.177  | 0.123  | 5.265  | 0.0040  |
| NH.HIGHLANDLAKE.HIGSTDND     | -0.050 | -0.042 | 0.040  | -0.012 | -1.543 | 0.0005  |
| NH.HILLSPOND.HILALTD         | -0.025 | 0.060  | -0.085 | 0.034  | -1.501 | -0.0008 |
| NH.HubbardBrook.Mirror       | 0.067  | -0.060 | 0.137  | -0.014 | 1.565  | 0.0028  |
| NH.ISLANDPOND.ISLDERD        | 0.028  | 0.043  | -0.010 | 0.047  | 1.523  | 0.0000  |
| NH.ISLANDPOND.ISLSTDVLAPD    | 0.009  | NA     | NA     | 0.014  | -0.042 | NA      |
| NH.KEZARLAKE.KEZSUTD         | 0.164  | -0.016 | 0.198  | 0.151  | 3.075  | 0.0093  |
| NH.KOLELEMOOKLAKE.KOLSPRD    | 0.013  | 0.008  | 0.000  | 0.017  | -0.632 | 0.0001  |
| NH.LAKEWINNISQUAM.WINPLACD   | 0.012  | NA     | NA     | 0.073  | -0.623 | NA      |
| NH.LAKEWINONA.WINNWH         | 0.031  | 0.100  | -0.070 | 0.059  | -0.905 | 0.0003  |
| NH.LAURELLAKE.LAUFITD        | 0.087  | 0.017  | 0.105  | 0.033  | 3.473  | 0.0021  |
| NH.LEAVITTBAY.LEAOSSD        | 0.005  | 0.139  | -0.211 | 0.037  | -3.050 | -0.0044 |
| NH.LONGPOND.LONLEMD          | 0.011  | -0.094 | 0.100  | -0.170 | 1.274  | 0.0005  |
| NH.LOONLAKE.LOOLYD           | 0.040  | 0.125  | -0.106 | 0.070  | -2.365 | -0.0009 |
| NH.LOWERSUNCOOKPOND.SUNLBRND | 0.167  | NA     | NA     | 0.192  | -0.708 | NA      |
| NH.LSPA.Sunapee              | 0.108  | 0.050  | 0.000  | 0.031  | 1.918  | 0.0006  |
| NH.MASSASECUMLAKE.MASBRAD    | 0.110  | 0.061  | 0.058  | 0.047  | 2.967  | 0.0017  |
| NH.MOUNTAINVIEWLAKE.MOUSUND  | 0.104  | 0.058  | 0.042  | NA     | NA     | 0.0039  |
| NH.NUBANUSITLAKE.NUBNELD     | 0.080  | 0.014  | 0.076  | 0.002  | 0.735  | 0.0007  |

|                              |        |        |        |        |        |         |
|------------------------------|--------|--------|--------|--------|--------|---------|
| NH.OTTERPOND.OTTSTUND        | 0.067  | -0.005 | 0.092  | 0.058  | 2.474  | 0.0039  |
| NH.PARTRIDGELAKE.PARLTLD     | 0.090  | 0.049  | 0.033  | 0.006  | 0.338  | 0.0017  |
| NH.PAWTUCKAWAYLAKE.PAWNOTND  | -0.020 | 0.014  | -0.034 | -0.009 | -0.089 | -0.0011 |
| NH.PEARLYLAKE.PEARIND        | 0.089  | NA     | NA     | 0.070  | 3.946  | NA      |
| NH.PERKINSPOND.PERSUND       | 0.068  | NA     | NA     | 0.062  | -1.928 | NA      |
| NH.PINERIVERPOND.PINWAKD     | -0.148 | 0.103  | -0.224 | -0.010 | -3.664 | -0.0033 |
| NH.PLEASANTLAKE.PLEDEED      | 0.051  | 0.038  | 0.005  | 0.031  | 1.231  | 0.0007  |
| NH.PROVINCELAKE.PROEFFD      | -0.114 | NA     | NA     | -0.119 | -1.295 | NA      |
| NH.RANDPOND.RANGOSD          | 0.042  | 0.021  | -0.020 | 0.023  | -0.179 | -0.0006 |
| NH.ROCKPOND.ROCWIND          | -0.072 | -0.073 | -0.005 | -0.062 | 0.377  | -0.0008 |
| NH.ROCKYBOUNDPOND.ROCCROD    | -0.054 | -0.095 | 0.100  | -0.048 | -1.660 | 0.0024  |
| NH.RUSTPOND.RUSWOLD          | -0.033 | 0.044  | -0.113 | -0.027 | 0.951  | -0.0017 |
| NH.SANDPOND.SANMLWD          | 0.183  | -0.042 | 0.199  | 0.044  | 2.319  | 0.0034  |
| NH.SEBBINSPOUND.SEBBEDD      | -0.101 | -0.051 | -0.057 | -0.074 | -1.339 | -0.0064 |
| NH.SPOFFORDLAKE.SPOCHED      | 0.056  | 0.000  | 0.044  | 0.037  | -0.741 | 0.0007  |
| NH.STINSONLAKE.STIRUMD       | 0.075  | 0.013  | 0.041  | -0.006 | -1.076 | 0.0010  |
| NH.STOCKERPOND.STOGTMD       | 0.058  | -0.042 | 0.093  | 0.040  | 3.800  | 0.0067  |
| NH.SUNSETLAKE.SUNALTD        | 0.010  | 0.028  | 0.031  | 0.030  | -0.353 | 0.0011  |
| NH.SWANZEYLAKE.SWASWAD       | 0.096  | 0.050  | 0.025  | 0.015  | -1.433 | 0.0007  |
| NH.THORNDIKEPOND.THOFJAFD    | -0.058 | -0.069 | -0.006 | -0.061 | -2.100 | -0.0004 |
| NH.TODDLAKE.TODNBYD          | -0.125 | -0.158 | 0.015  | -0.136 | -1.735 | -0.0003 |
| NH.TOMPOND.TOMWRND           | -0.009 | NA     | NA     | -0.035 | 2.325  | NA      |
| NH.TUCKERPOND.TUCSBYD        | 0.050  | 0.078  | -0.014 | 0.105  | -2.892 | -0.0010 |
| NH.UPPERSUNCOOKPOND.SUNUBRND | 0.061  | -0.004 | 0.083  | -0.006 | -0.039 | 0.0019  |
| NH.WEBSTERLAKE.WEBFRKD       | 0.090  | -0.043 | 0.075  | 0.042  | -0.308 | 0.0024  |
| NH.WHITEOAKPOND.WHIHOLD      | 0.082  | 0.043  | -0.002 | 0.029  | -0.231 | 0.0014  |
| NY.ADK.EastLake              | 0.038  | -0.041 | 0.096  | -0.059 | 3.071  | 0.0015  |
| NY.ADK.FirstBisbyLake        | 0.100  | -0.051 | 0.150  | -0.061 | 3.806  | 0.0016  |
| NY.ADK.HonnedagaLake         | 0.084  | -0.164 | 0.227  | -0.107 | 5.343  | 0.0013  |
| NY.ADK.LittleMooseLake       | 0.074  | -0.024 | 0.082  | -0.028 | 2.594  | 0.0006  |
| NY.ADK.LowerSylvanPond       | 0.108  | NA     | NA     | 0.069  | 3.566  | NA      |
| NY.ADK.PantherLake           | 0.053  | -0.036 | 0.030  | 0.014  | 5.274  | 0.0017  |
| NY.ADK.RockLake              | 0.104  | 0.064  | 0.022  | 0.070  | 4.744  | 0.0018  |
| NY.CanadaragoLake            | 0.100  | -0.021 | 0.138  | -0.033 | 4.588  | 0.0026  |

|                     |        |        |        |        |        |         |
|---------------------|--------|--------|--------|--------|--------|---------|
| NY.Honeoye          | 0.078  | 0.024  | 0.030  | 0.032  | 2.231  | 0.0014  |
| NY.LakeGeorge       | 0.116  | NA     | NA     | 0.024  | 0.151  | NA      |
| NY.Mohonk           | 0.052  | -0.051 | 0.106  | -0.034 | 1.091  | 0.0013  |
| NY.NorthChautauqua  | 0.115  | -0.033 | 0.167  | 0.015  | 2.965  | 0.0035  |
| NY.Oneida           | 0.085  | 0.053  | 0.026  | 0.093  | 0.967  | 0.0008  |
| NY.SouthChautauqua  | -0.036 | 0.000  | 0.000  | -0.025 | 0.000  | 0.0000  |
| NY.UpperSaranac     | 0.069  | 0.050  | 0.000  | 0.065  | 1.148  | 0.0006  |
| ON.BlueChalk        | -0.042 | -0.009 | -0.029 | -0.044 | 2.054  | -0.0005 |
| ON.Chub             | 0.006  | 0.012  | 0.000  | -0.004 | 2.061  | 0.0001  |
| ON.Crosson          | -0.018 | 0.010  | -0.029 | -0.004 | 2.634  | -0.0002 |
| ON.Dickie           | -0.019 | -0.007 | -0.028 | -0.014 | 0.341  | -0.0004 |
| ON.Harp             | 0.032  | 0.020  | 0.014  | 0.023  | 0.402  | 0.0002  |
| ON.Heney            | -0.011 | -0.029 | 0.000  | -0.018 | 1.622  | 0.0003  |
| ON.Opeongo          | -0.026 | -0.101 | 0.059  | -0.055 | 1.088  | 0.0001  |
| ON.Plastic          | 0.040  | -0.009 | 0.032  | -0.013 | 0.871  | 0.0005  |
| ON.RedChalkMain     | -0.006 | 0.000  | -0.006 | -0.020 | -0.294 | 0.0000  |
| PA.Beltzville       | 0.073  | -0.039 | 0.126  | 0.030  | 1.225  | 0.0006  |
| PA.BlueMarsh        | 0.131  | 0.049  | 0.098  | 0.074  | -0.264 | 0.0021  |
| PA.Giles            | 0.071  | -0.158 | 0.224  | -0.129 | 3.126  | 0.0012  |
| PA.Lacawac          | 0.069  | -0.052 | 0.082  | -0.031 | 1.613  | 0.0018  |
| PA.Wallenpaupack    | 0.028  | -0.060 | 0.115  | -0.019 | 1.267  | 0.0016  |
| RI.DeepCharlestown  | 0.069  | NA     | NA     | NA     | NA     | NA      |
| RI.Georgiaville     | 0.056  | NA     | NA     | NA     | NA     | NA      |
| RI.HundredAcre      | 0.000  | NA     | NA     | NA     | NA     | NA      |
| RI.SchoolhouseLower | 0.000  | NA     | NA     | -0.075 | 6.531  | NA      |
| RI.Watchaug         | -0.015 | NA     | NA     | NA     | NA     | NA      |
| RI.White            | 0.000  | NA     | NA     | NA     | NA     | NA      |
| RI.Yawgoo           | 0.109  | NA     | NA     | NA     | NA     | NA      |
