# Supplementary material
Source: MDPI journal article supplement (https://www.mdpi.com/2073-4441/9/6/442)
Supplement: s1 [file s1]

Archive with 5 entries (5 files):
- TempSentinelsNENA-LakeTempTrends-SUPPLEMENTAL-09Jun2017.pdf
- TempSentinelsNENA-LakeTempTrends-SUPPLEMENTAL-TableS1withCover-08Jun2017.pdf
- TempSentinelsNENA-LakeTempTrends-SUPPLEMENTAL-TableS2withCover-04Jun2017.pdf
- TempSentinelsNENA-LakeTempTrends-SUPPLEMENTAL-TableS3withCover-04Jun2017.pdf
- TempSentinelsNENA-LakeTempTrends-SUPPLEMENTAL-TableS4withCover-04Jun2017.pdf
